# Supplementary material for: Double Digital Assay for Single Extracellular Vesicle and Single Molecule Detection
Source: PubMed Central journal article supplement (PMC10667851; doi:10.1002/advs.202303619), 2023-10-06
Supplement: ADVS-10-2303619-s001.pdf [file ADVS-10-2303619-s001.pdf]

## Supporting Information

for *Adv. Sci.*, DOI 10.1002/adv.202303619

Double Digital Assay for Single Extracellular Vesicle and Single Molecule Detection

*David E. Reynolds, Menghan Pan, Jingbo Yang, George Galanis, Yoon Ho Roh, Renee-Tyler T. Morales, Shailesh Senthil Kumar, Su-Jin Heo, Xiaowei Xu, Wei Guo and Jina Ko\**

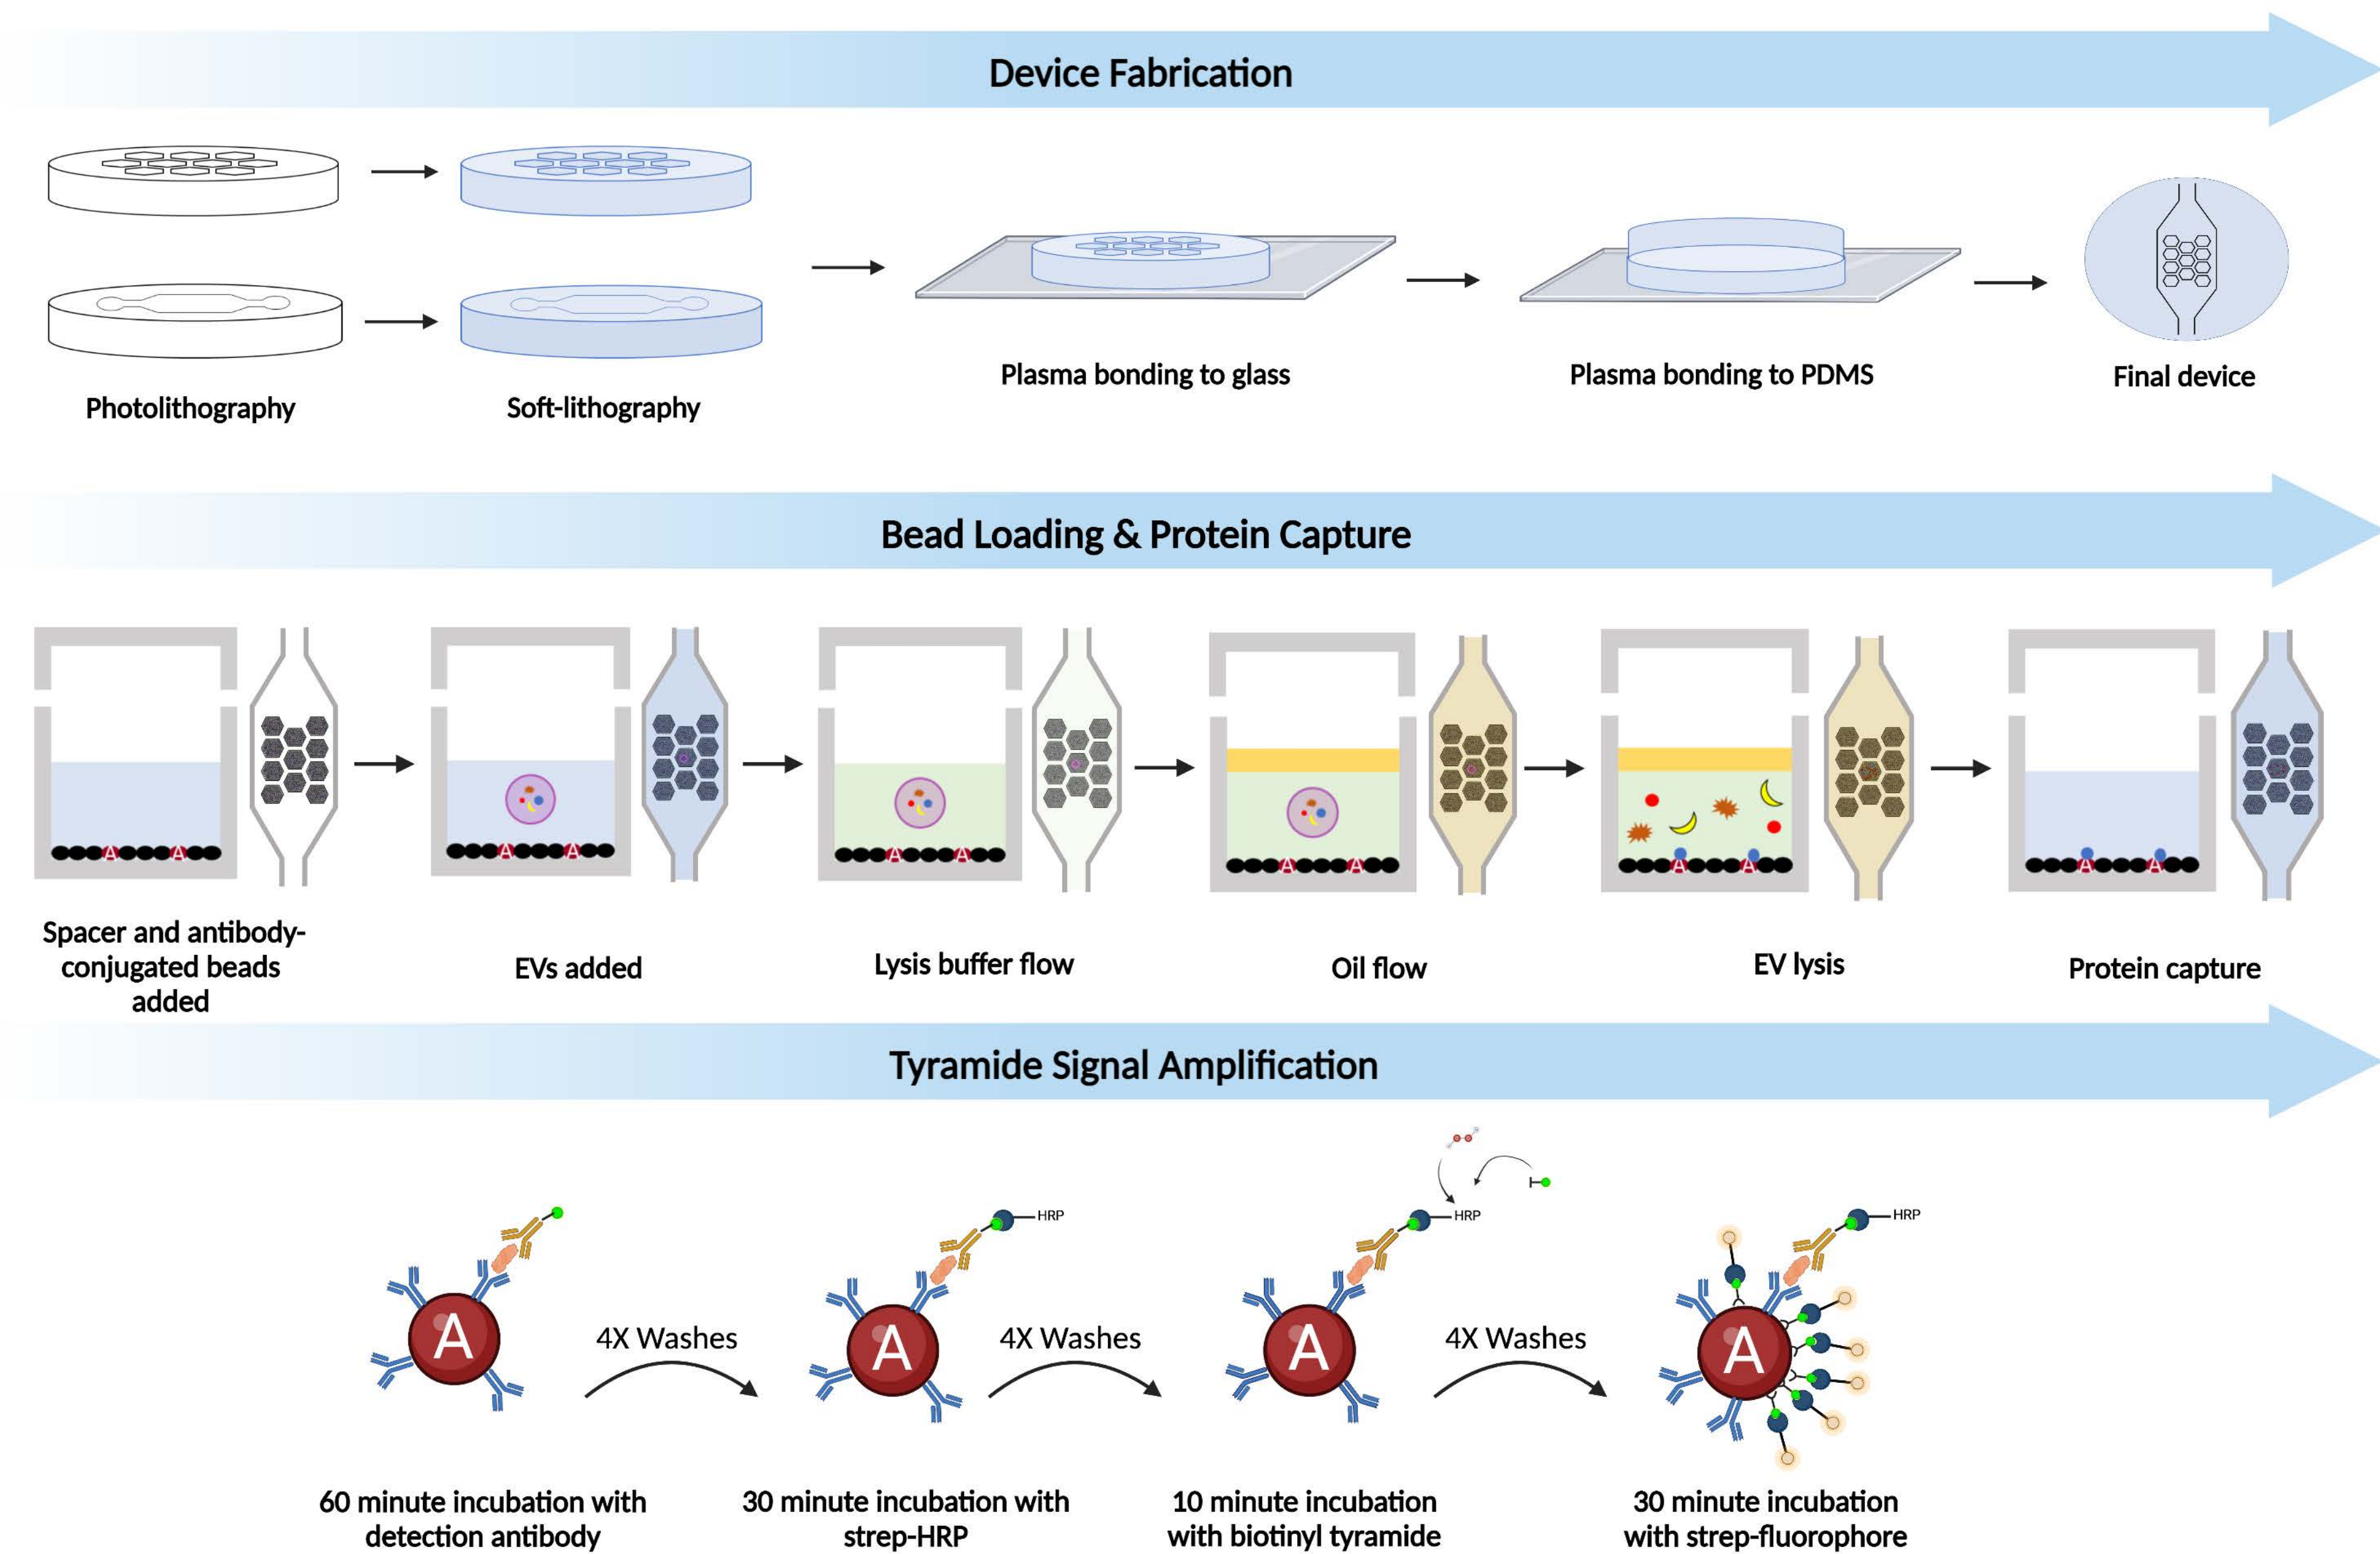

**Supplementary Figure 1.** Extended schematic for EV microwell assay.

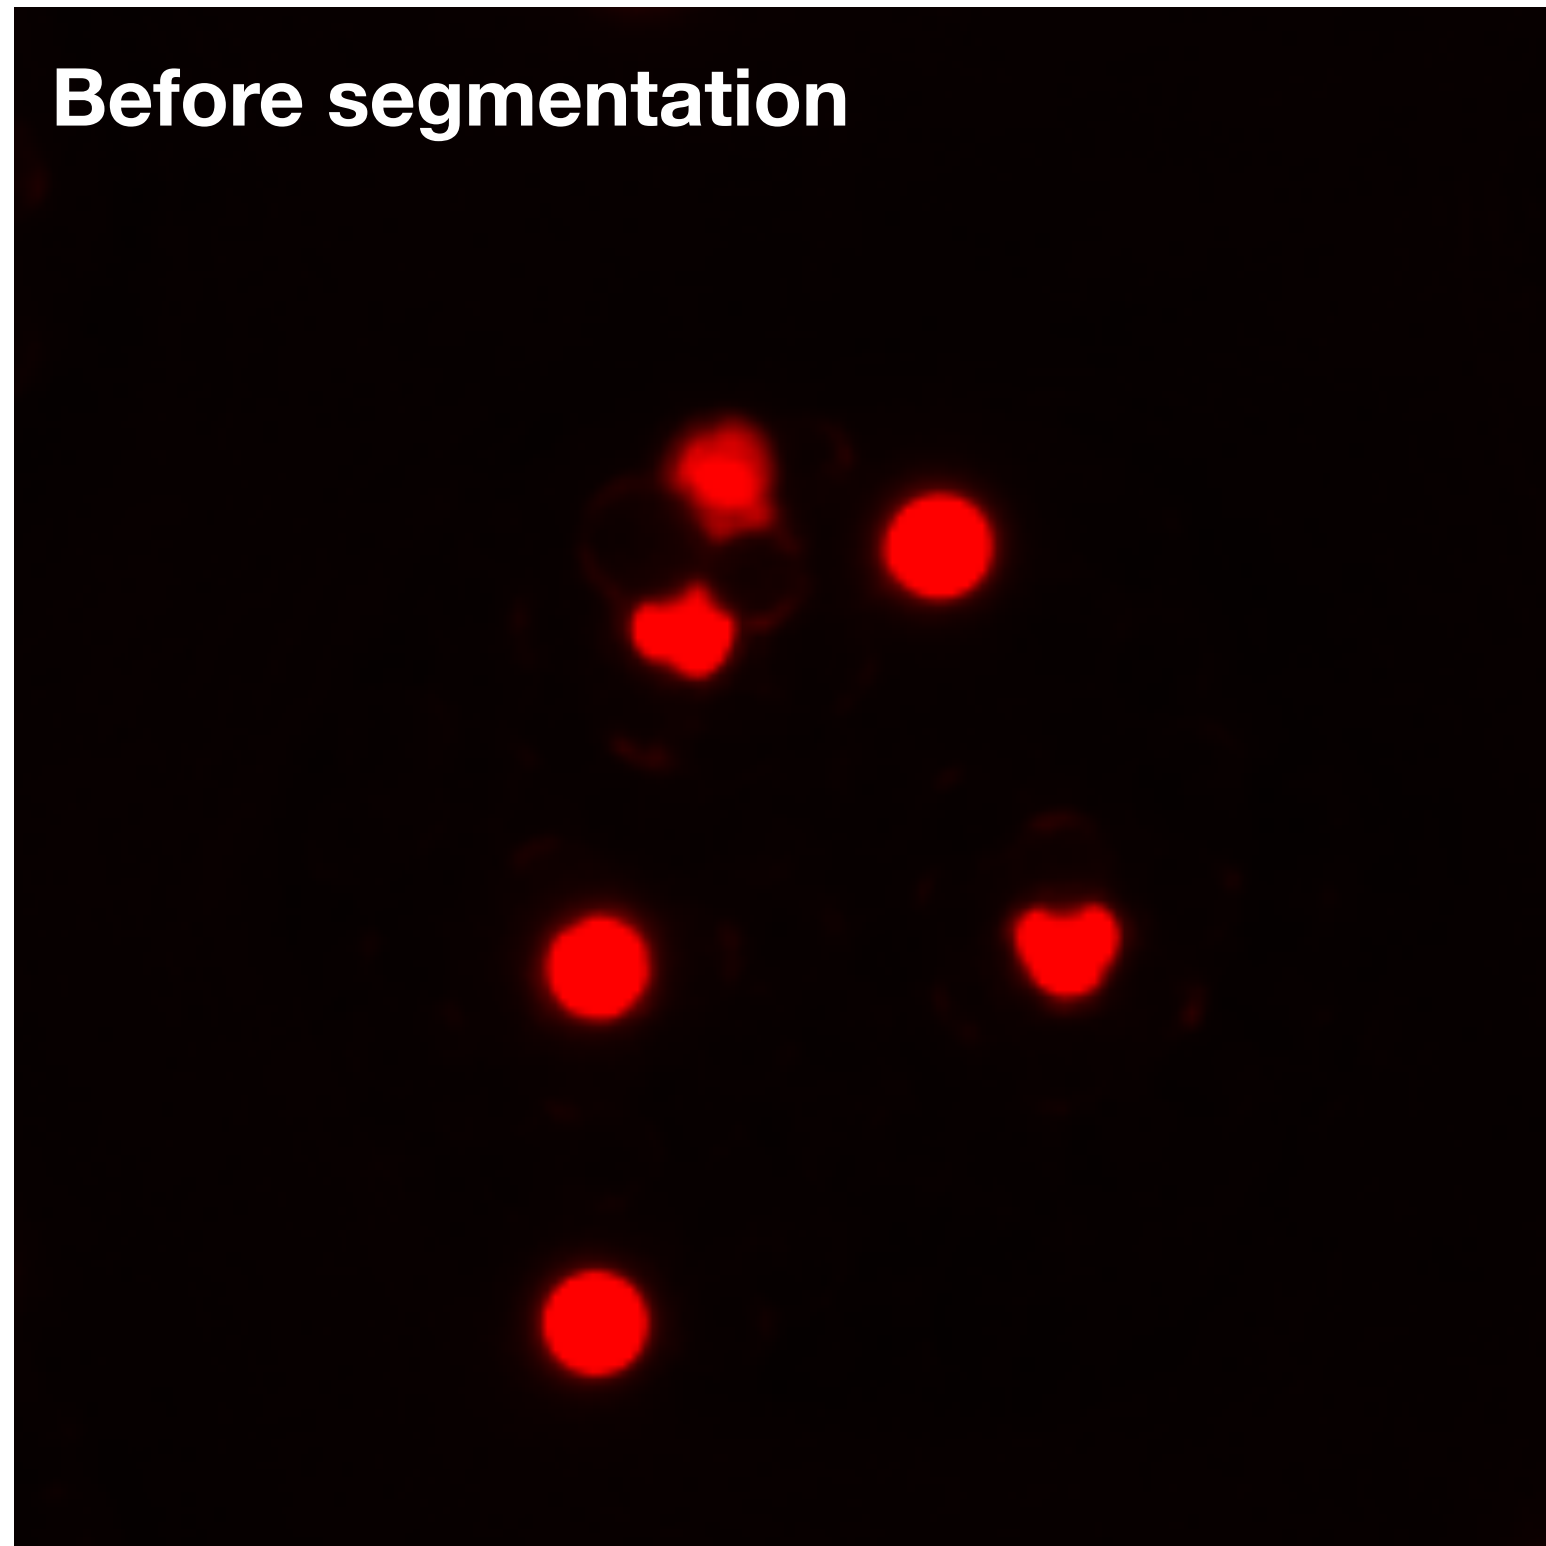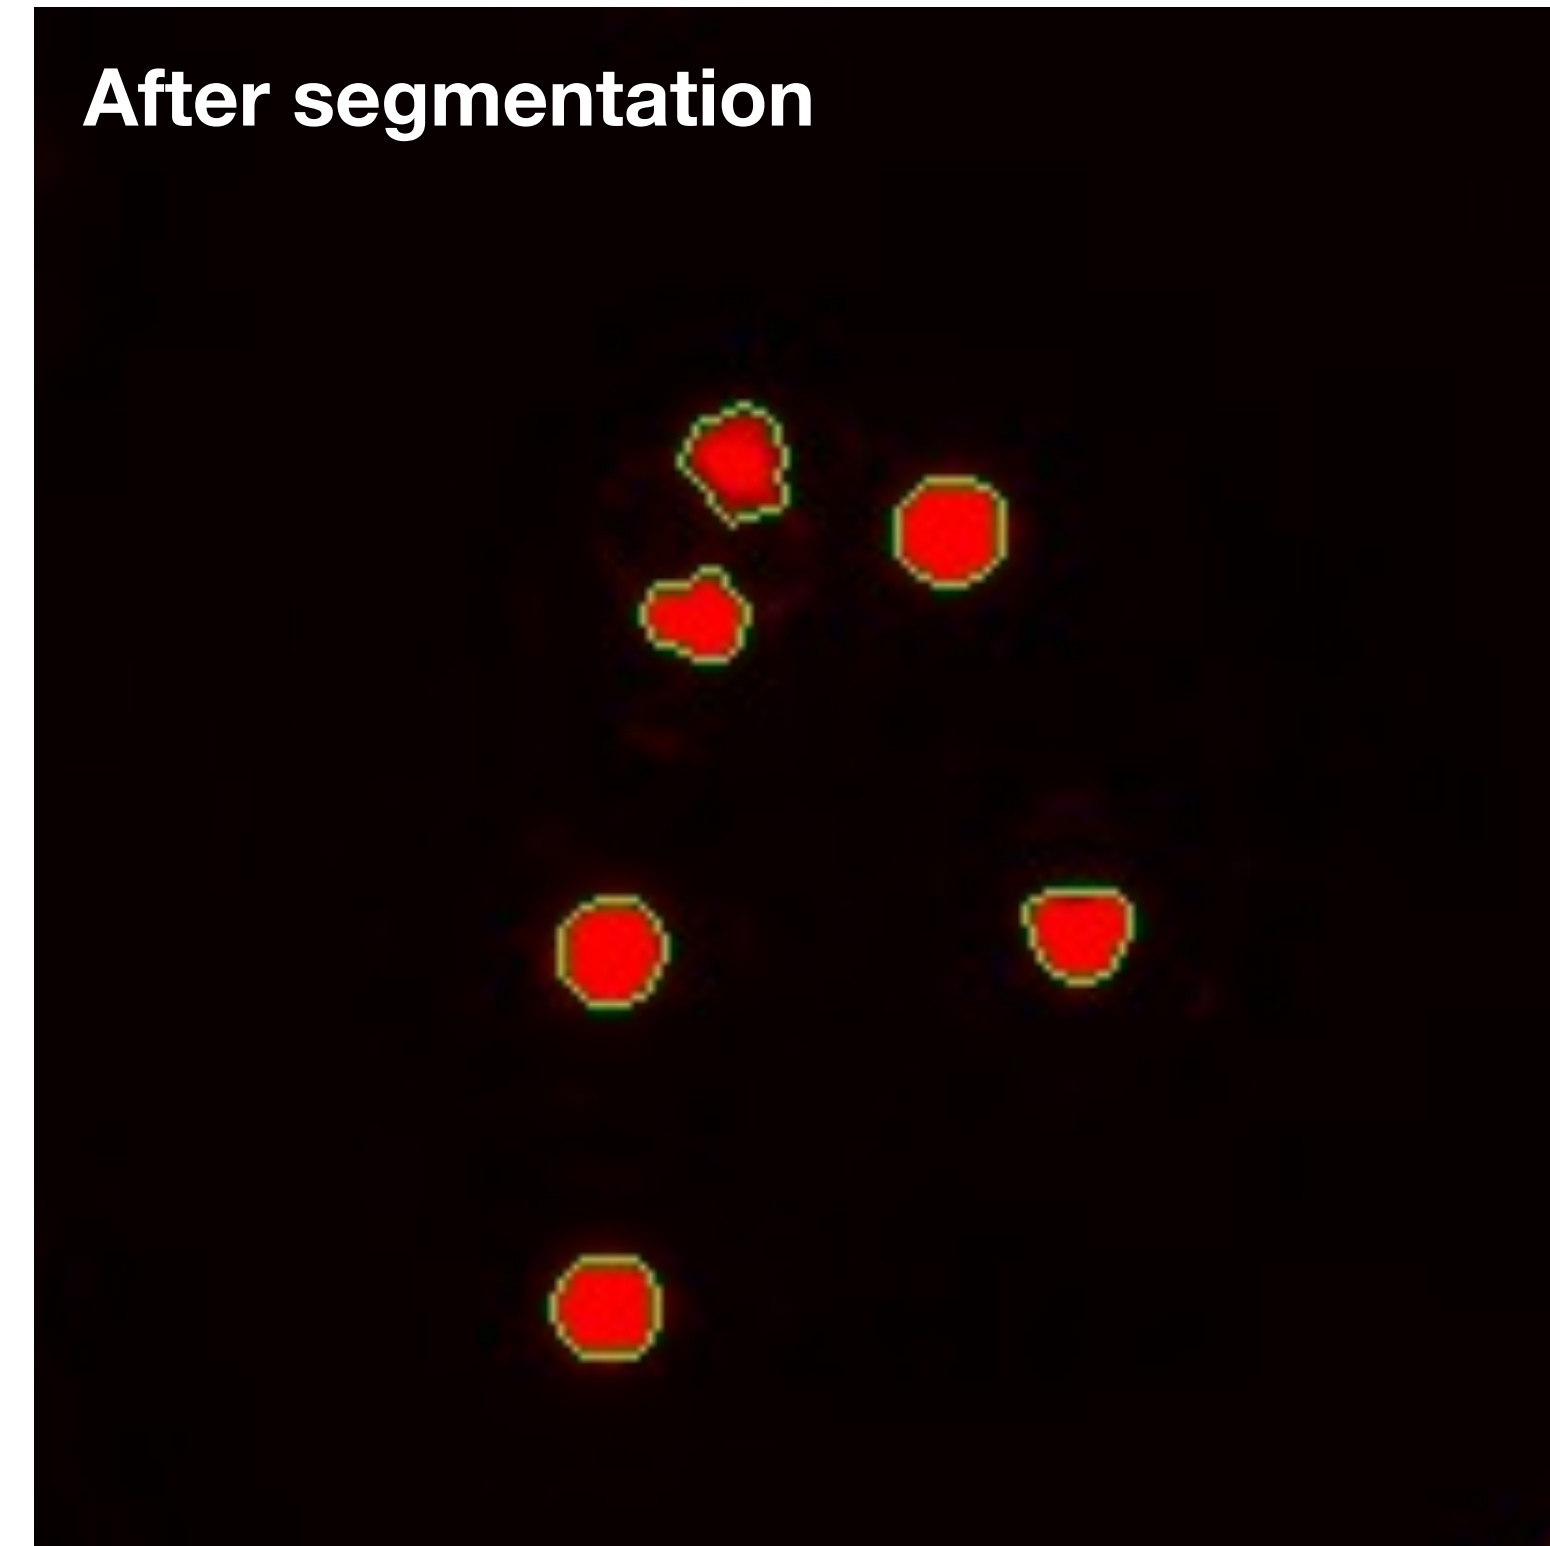

**Supplementary Figure 2.** Fluorescent beads are segmented and counted using Python computer vision program with a CV2 plugin.

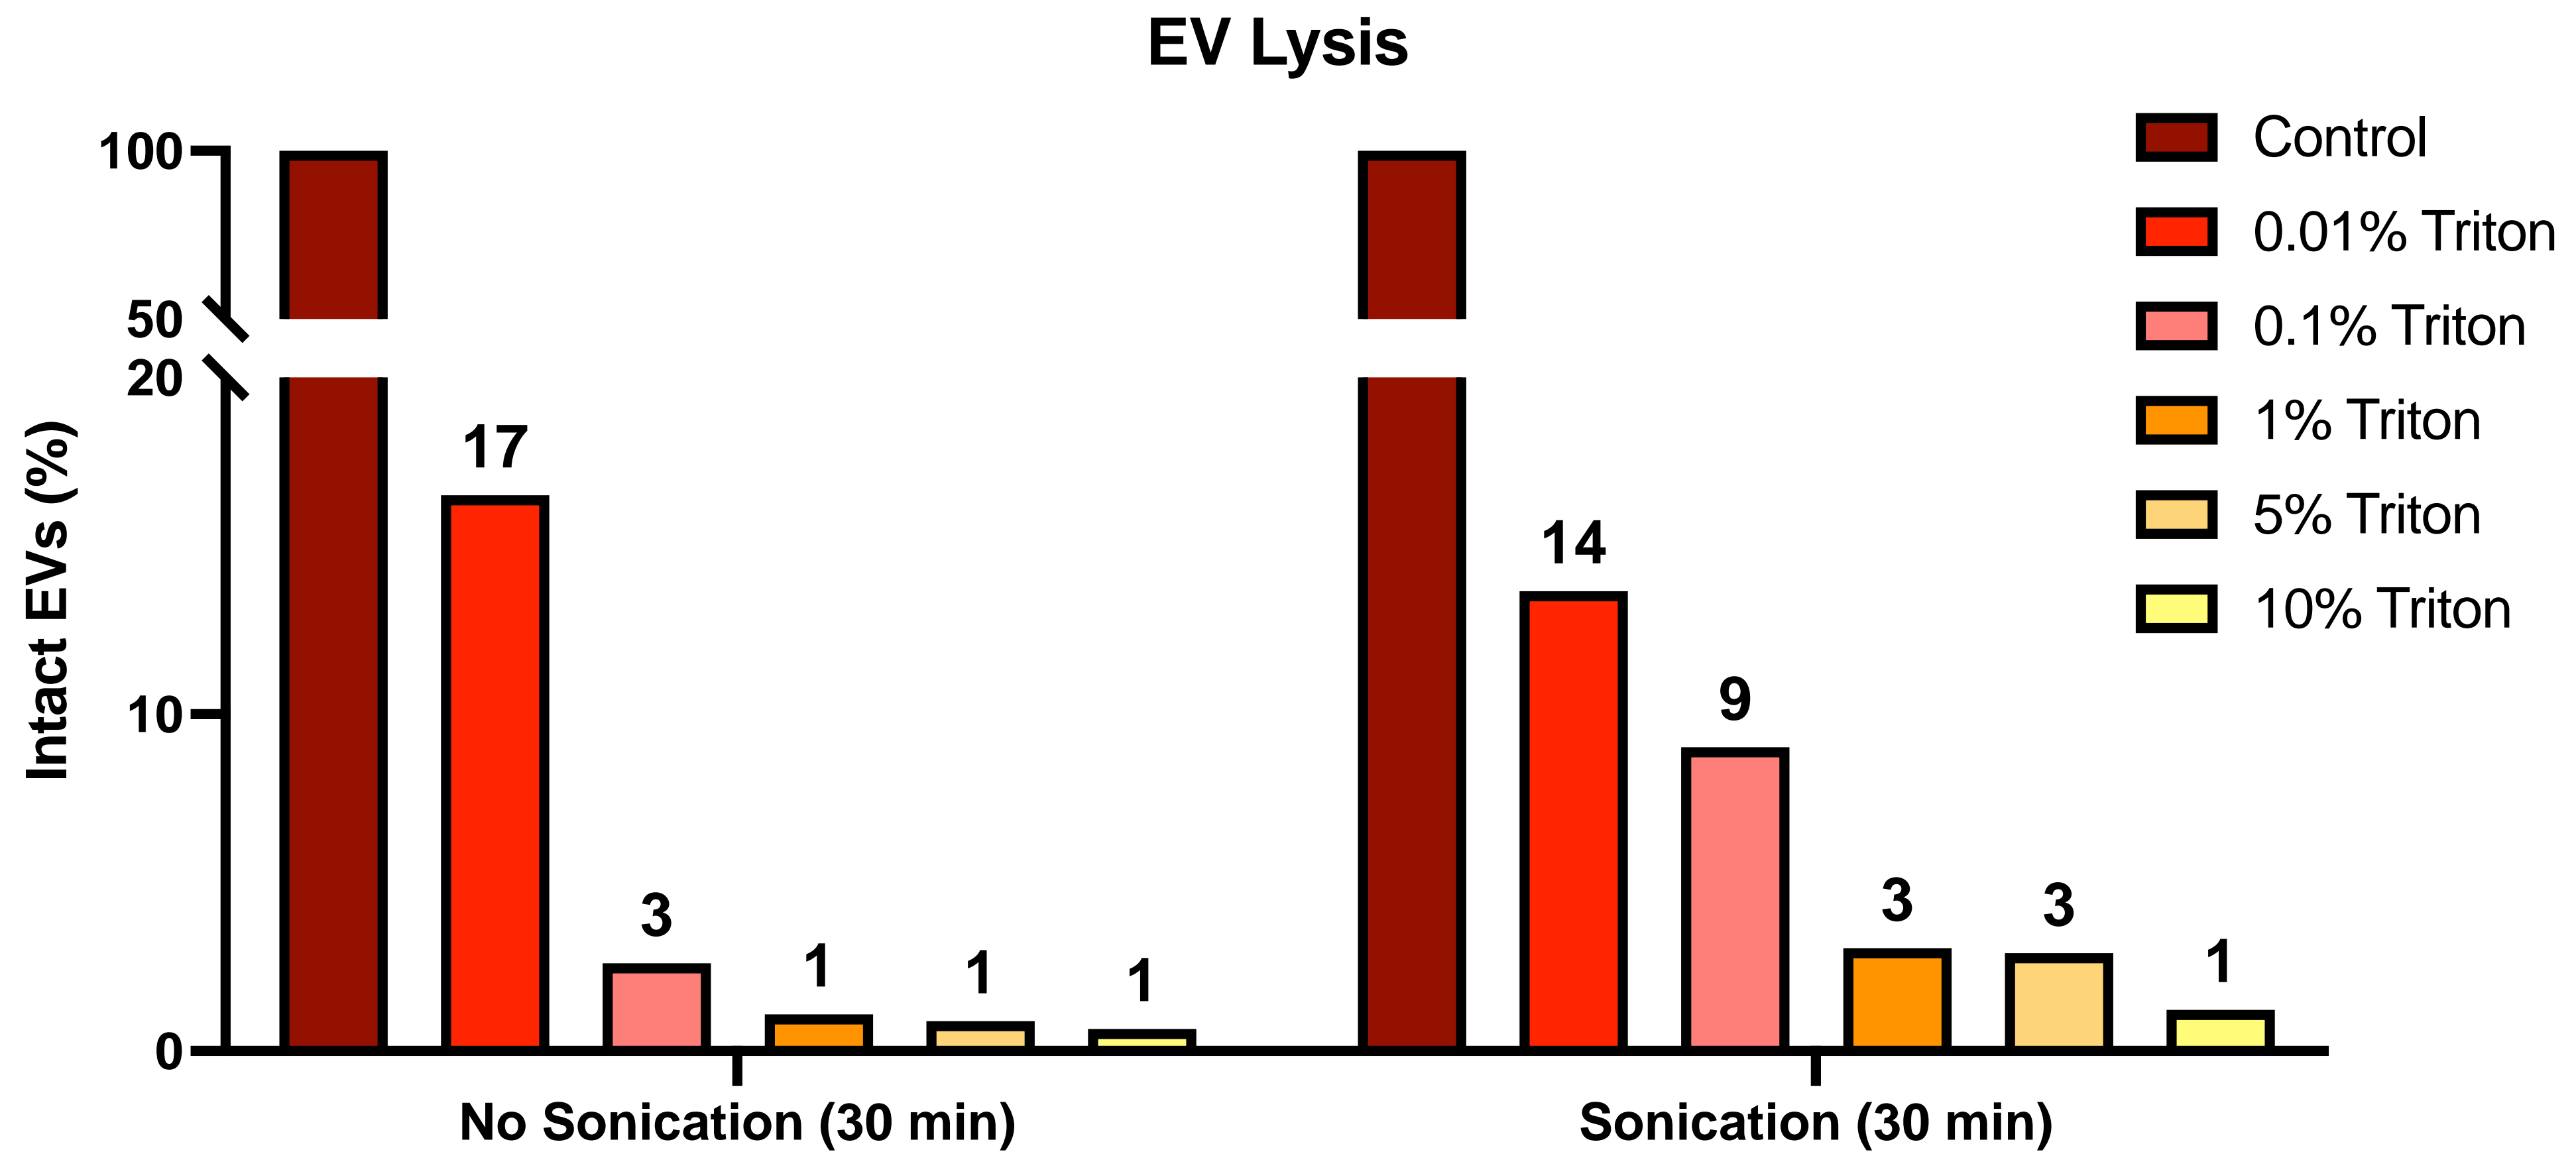

**Supplementary Figure 3.** EV Lysing optimization with different conditions: with/out sonication and Triton X-100. For image analysis, three images were quantified for each condition (n=3).

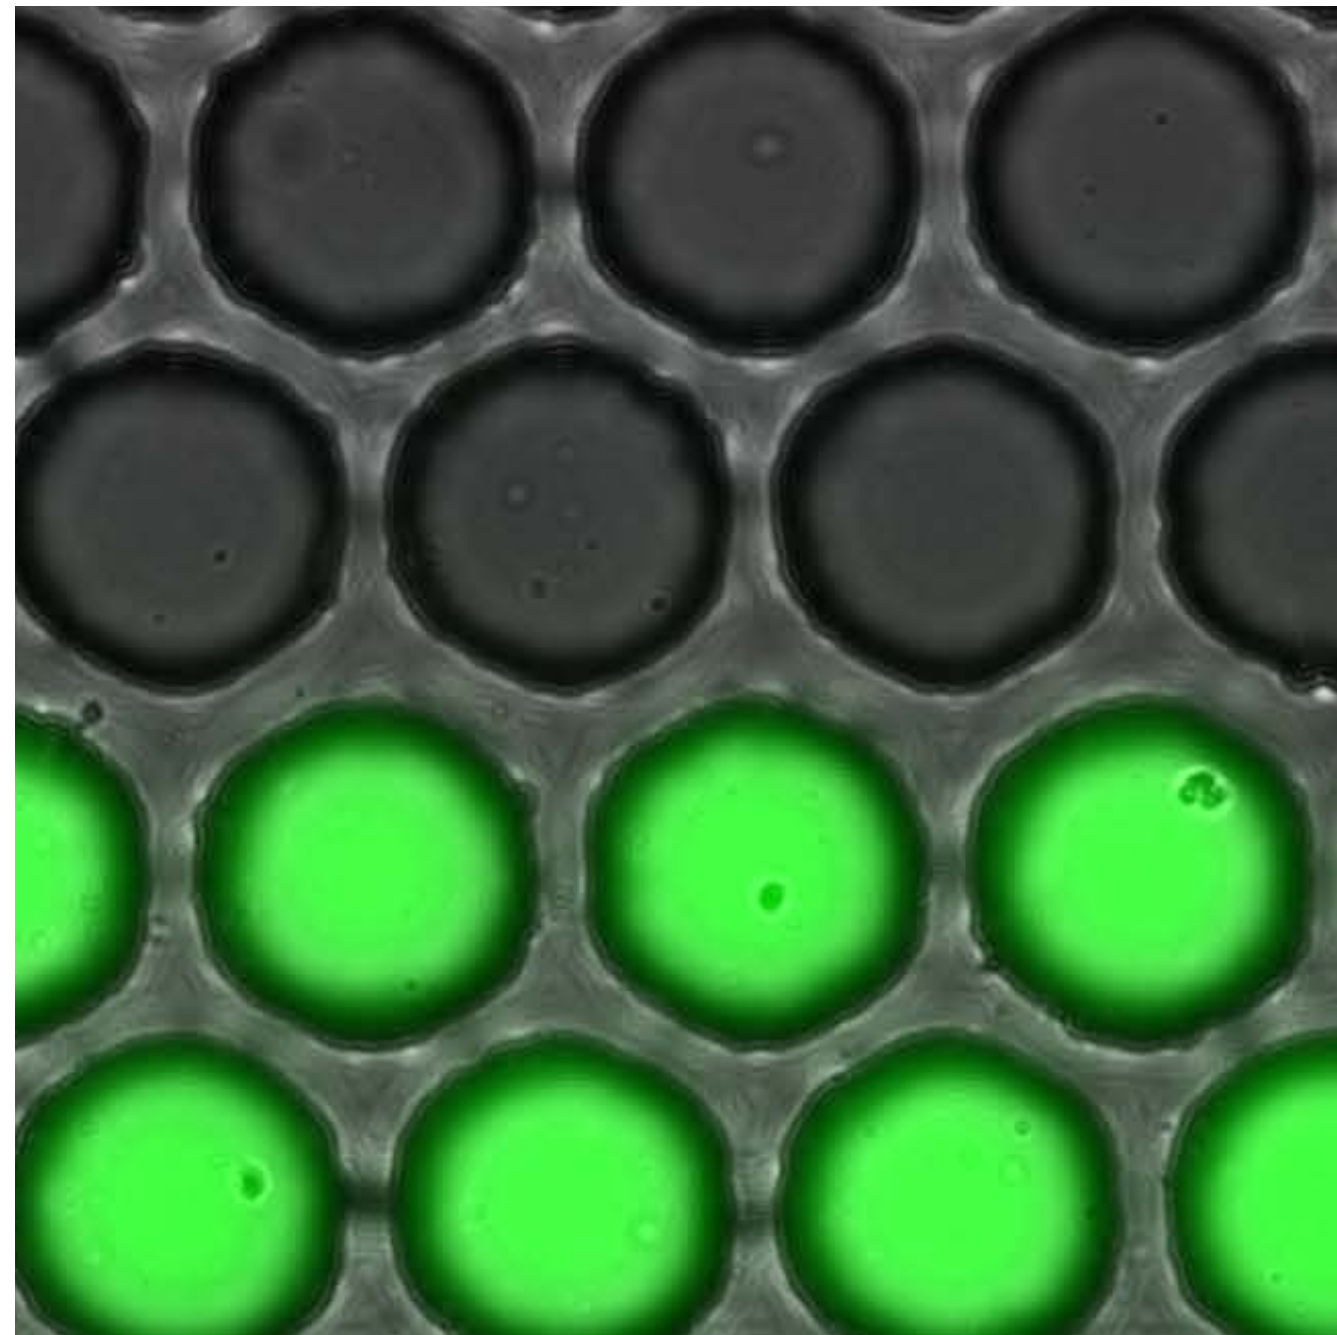

**0 minutes**

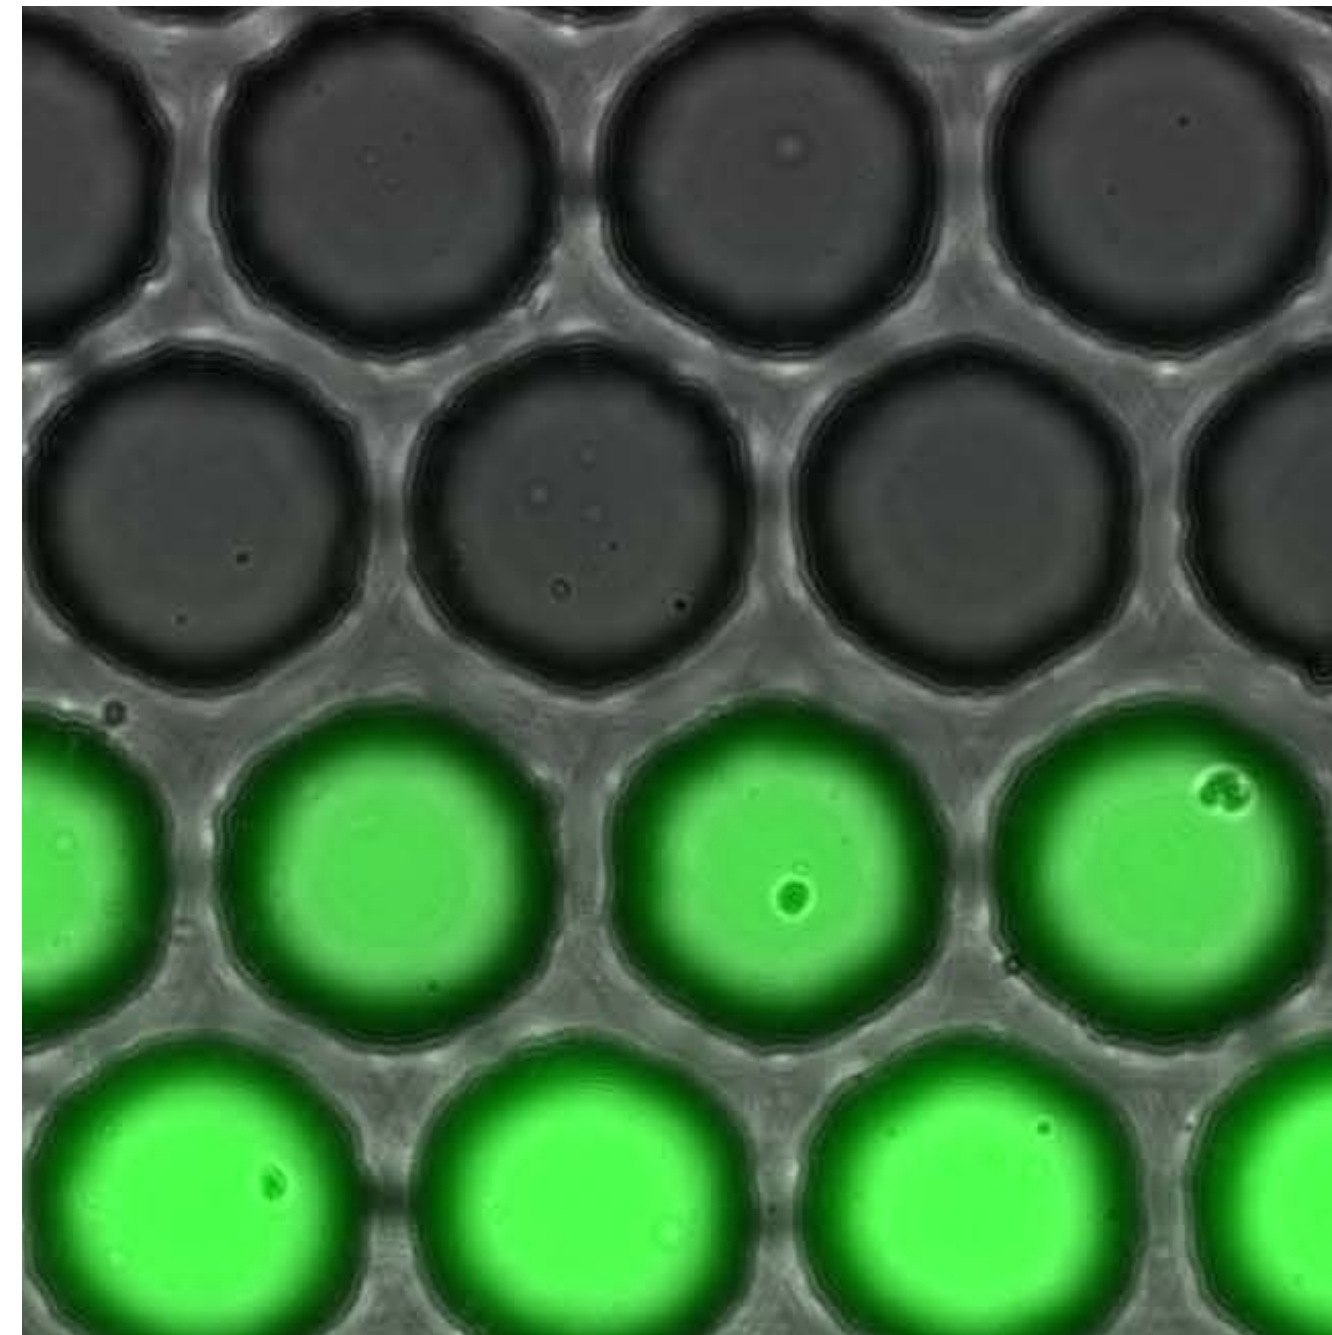

**30 minutes**

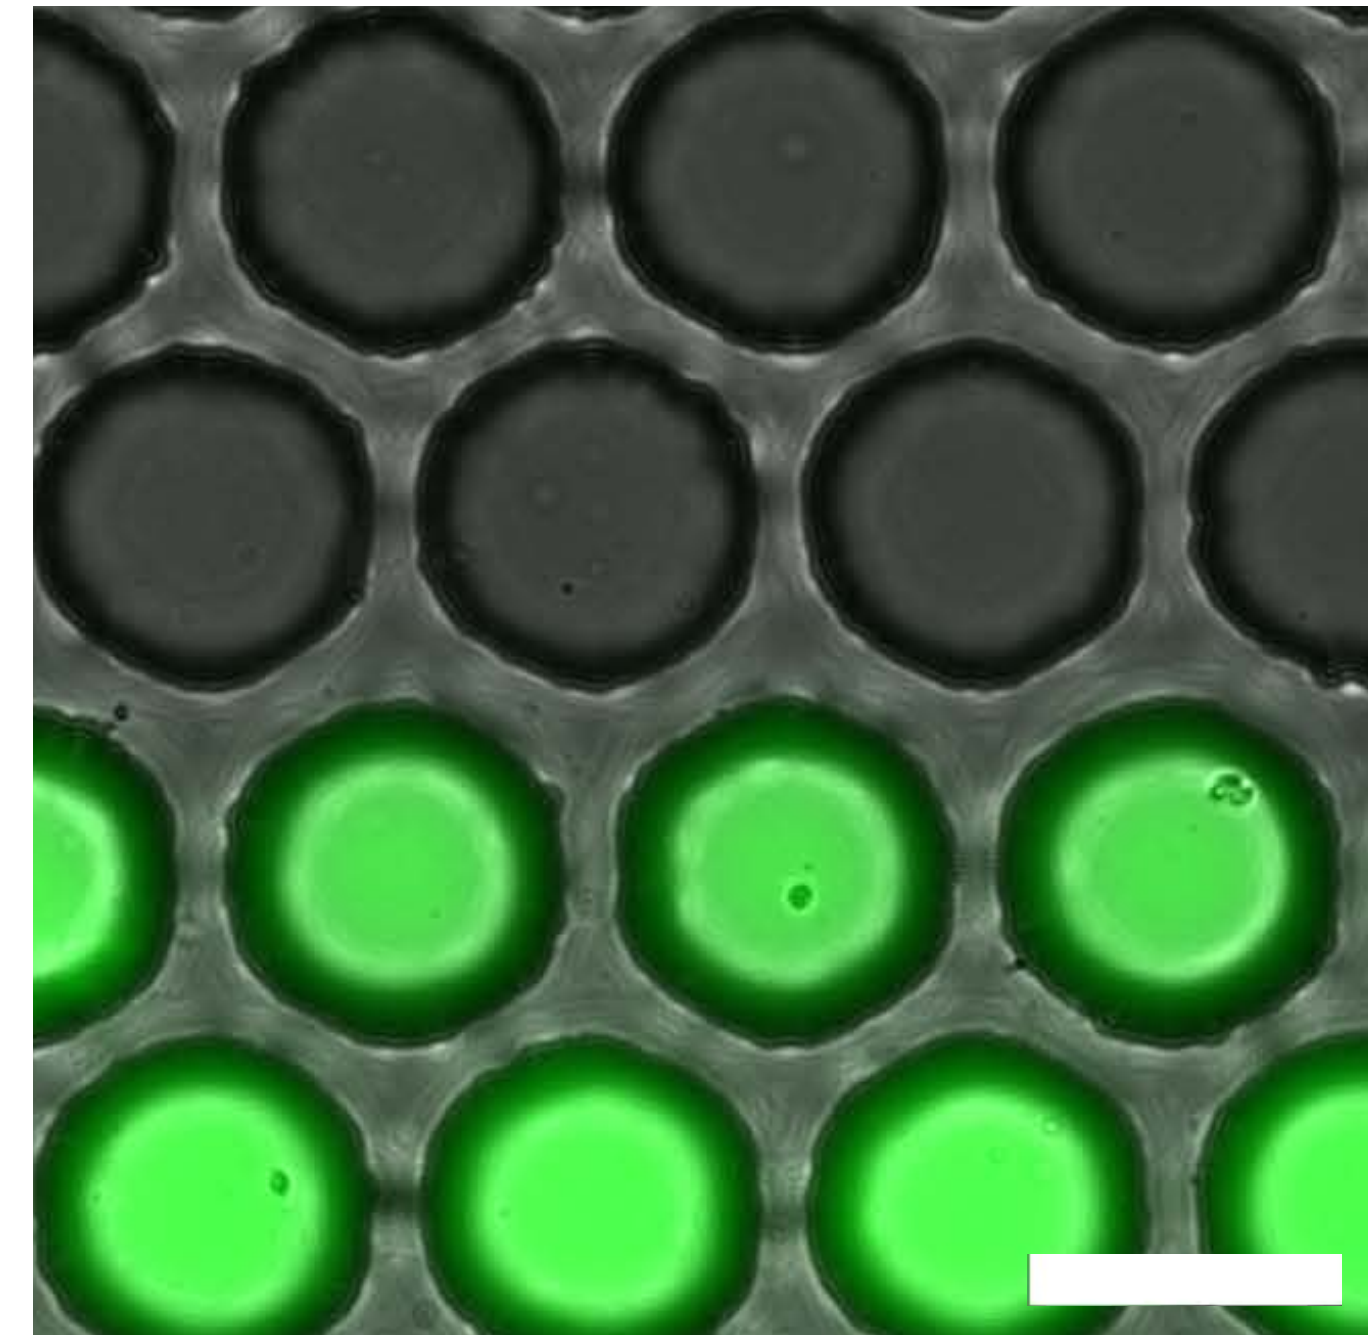

**60 minutes**

**Supplementary Figure 4.** Cross-contamination between PDMS microwells was verified with PBS suspended in FITC dextran and oil. Images were taken at three different time points (0, 30, and 60 minutes). (Scale bar = 50  $\mu\text{m}$ )

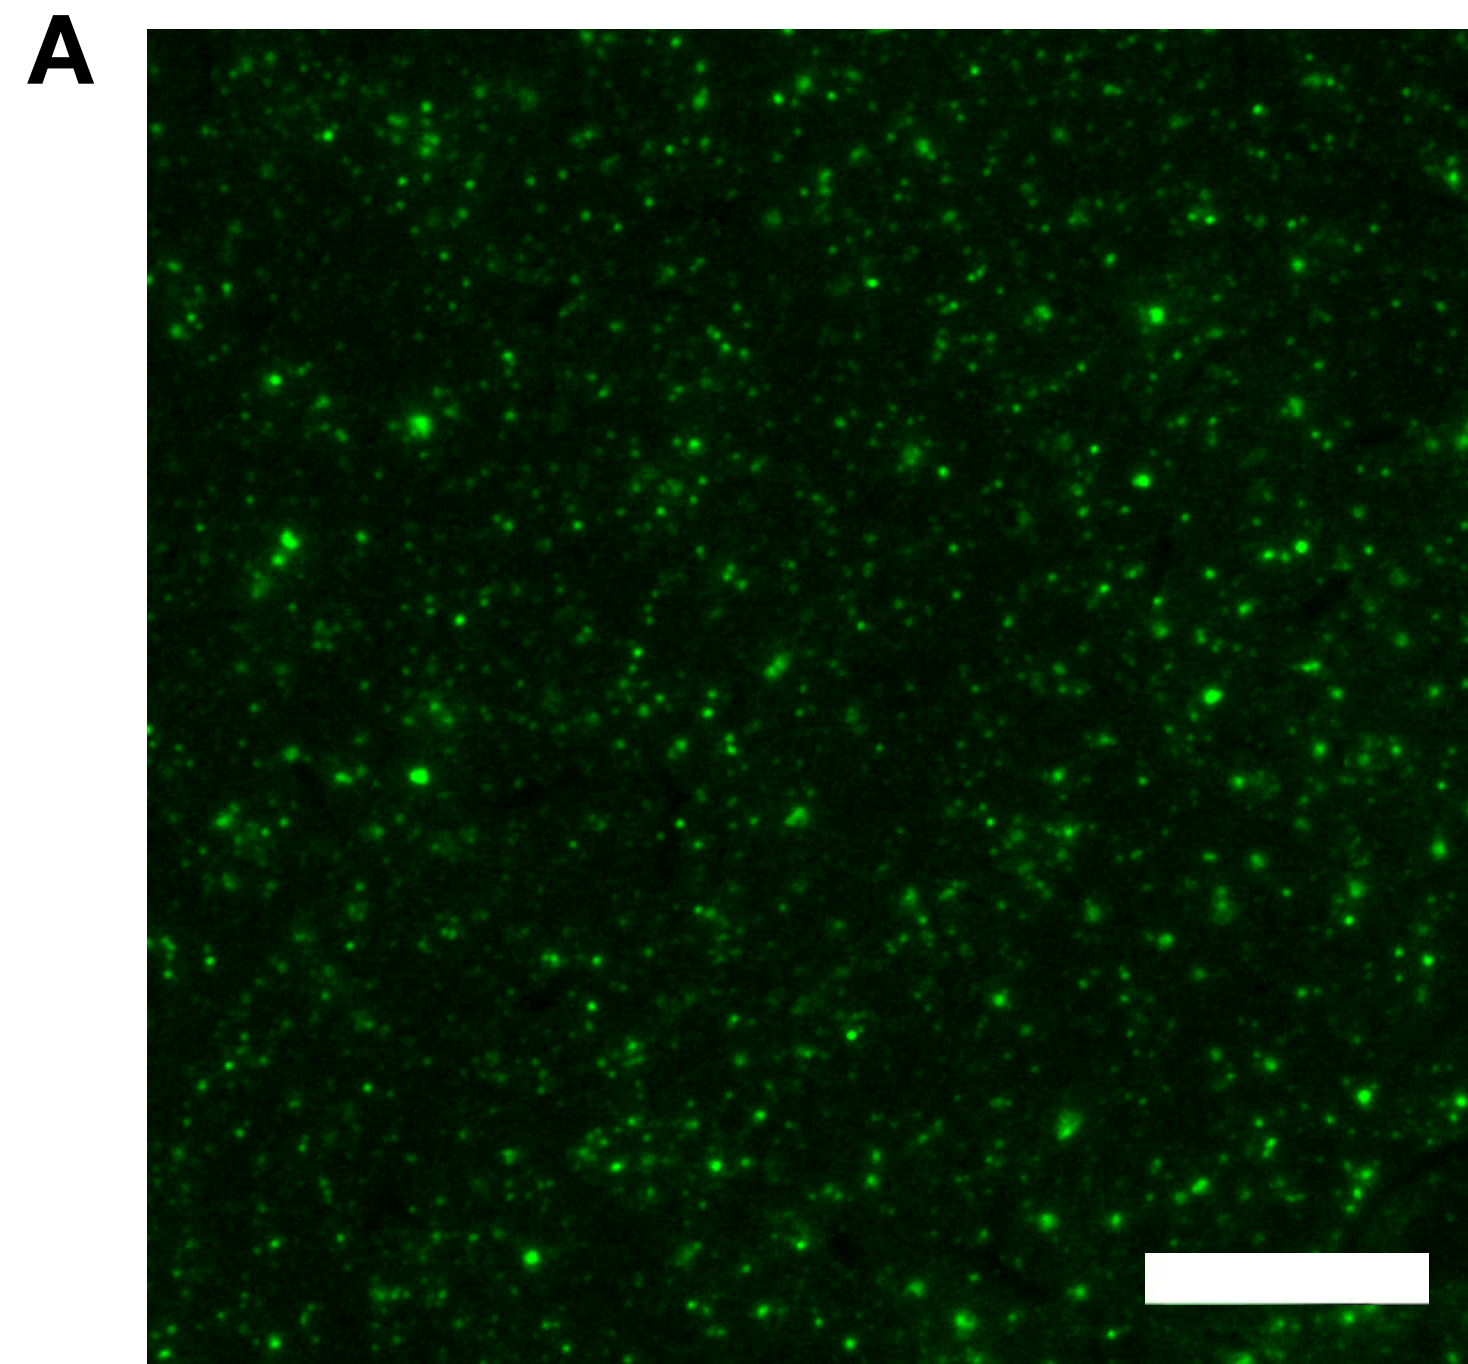

**Bulk EVs**

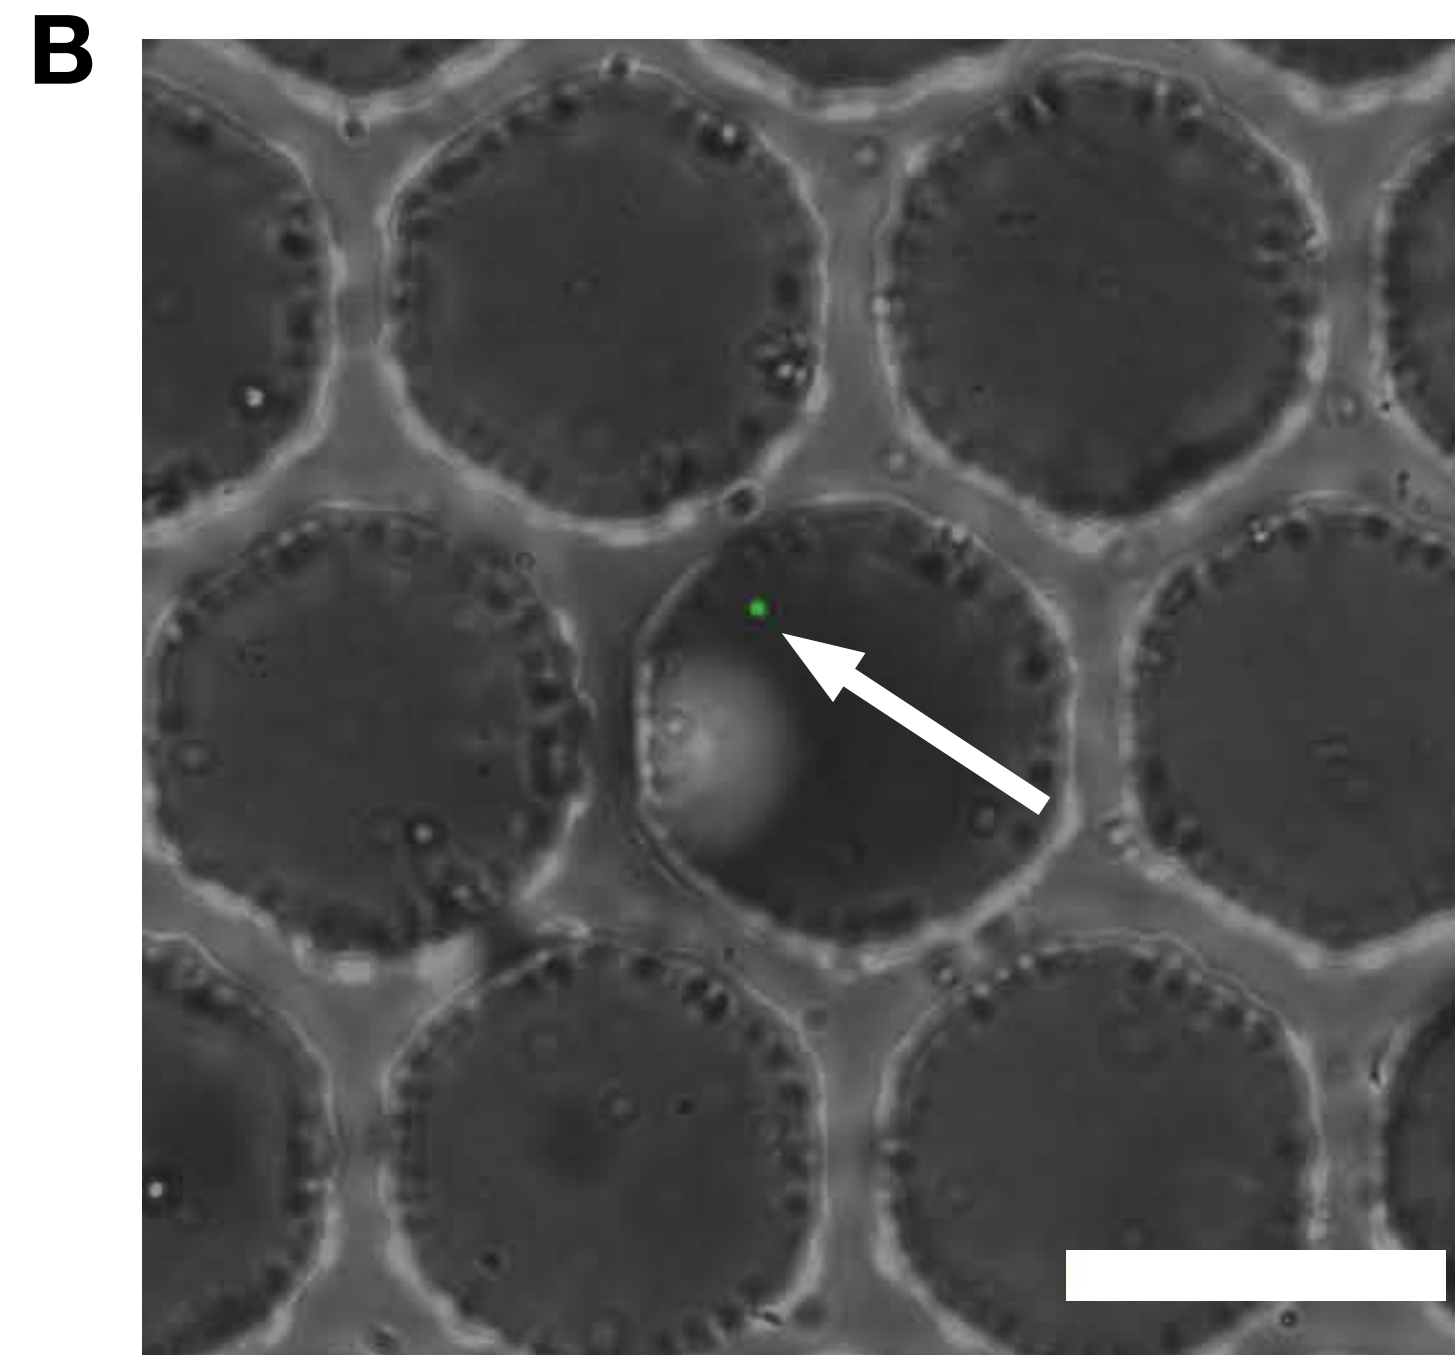

**Single EV**

**Supplementary Figure 5.** EV calcein green AM staining. **A)** Bulk EV staining on a glass slide. (scale bar = 20  $\mu\text{m}$ ) **B)** Single EV loading into PDMS microwells. (scale bar = 50  $\mu\text{m}$ ).

**Cell loading into microwells**

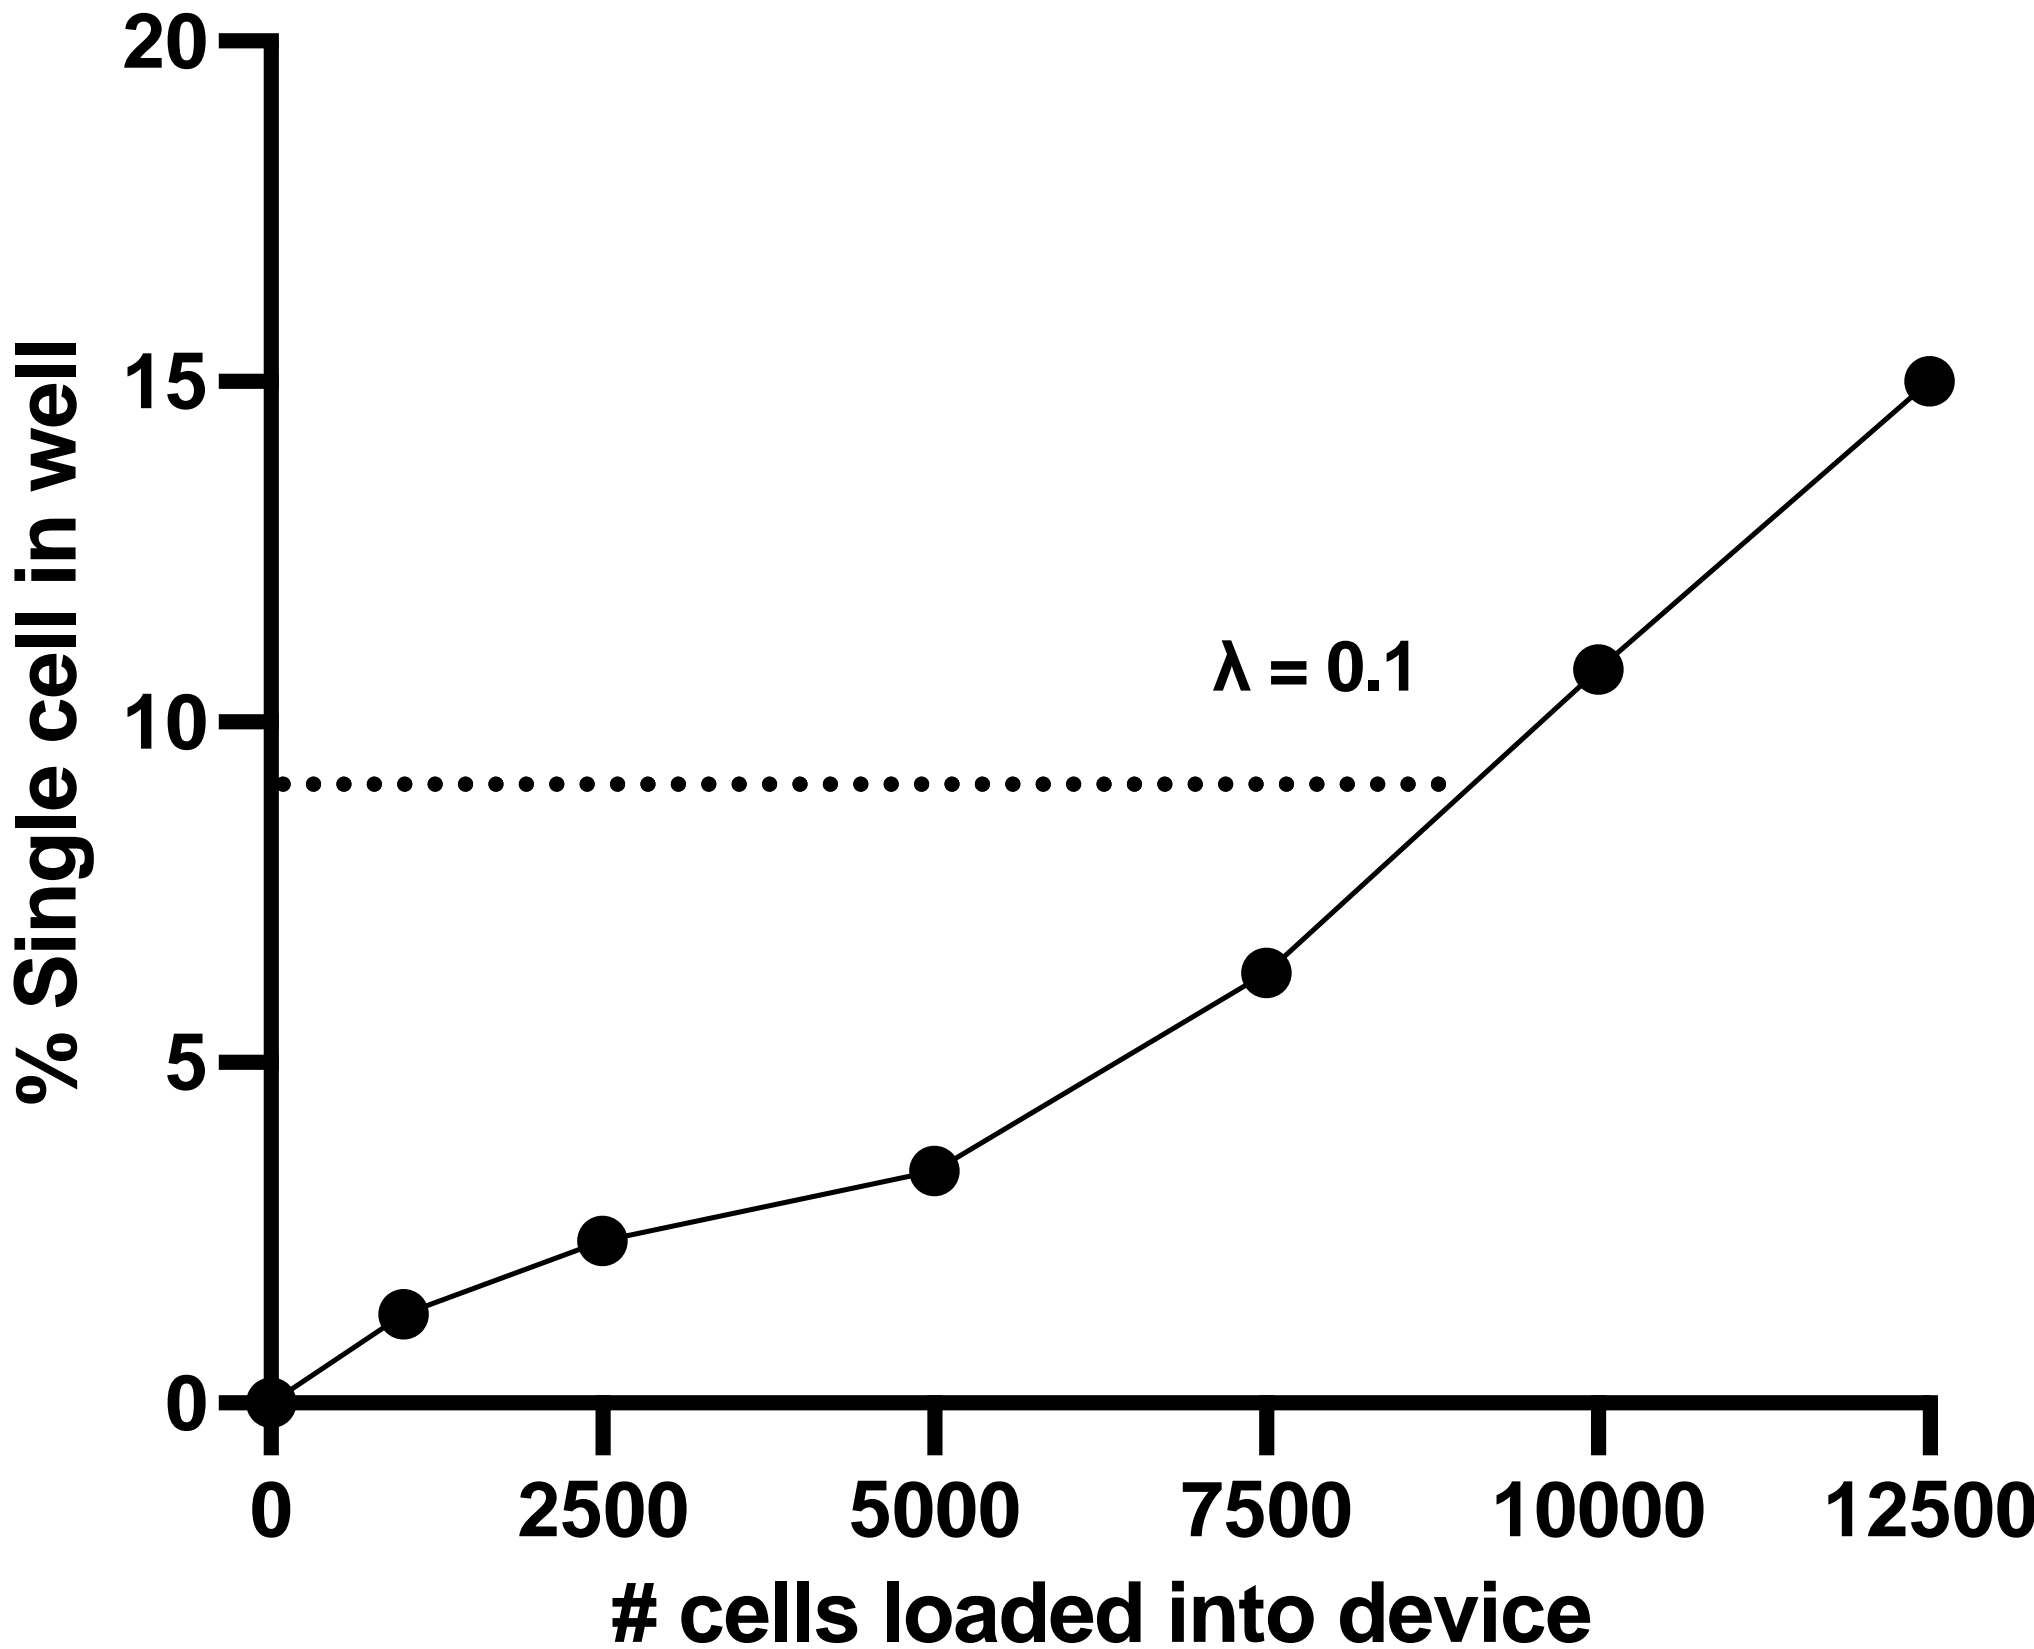

**EV loading into microwells**

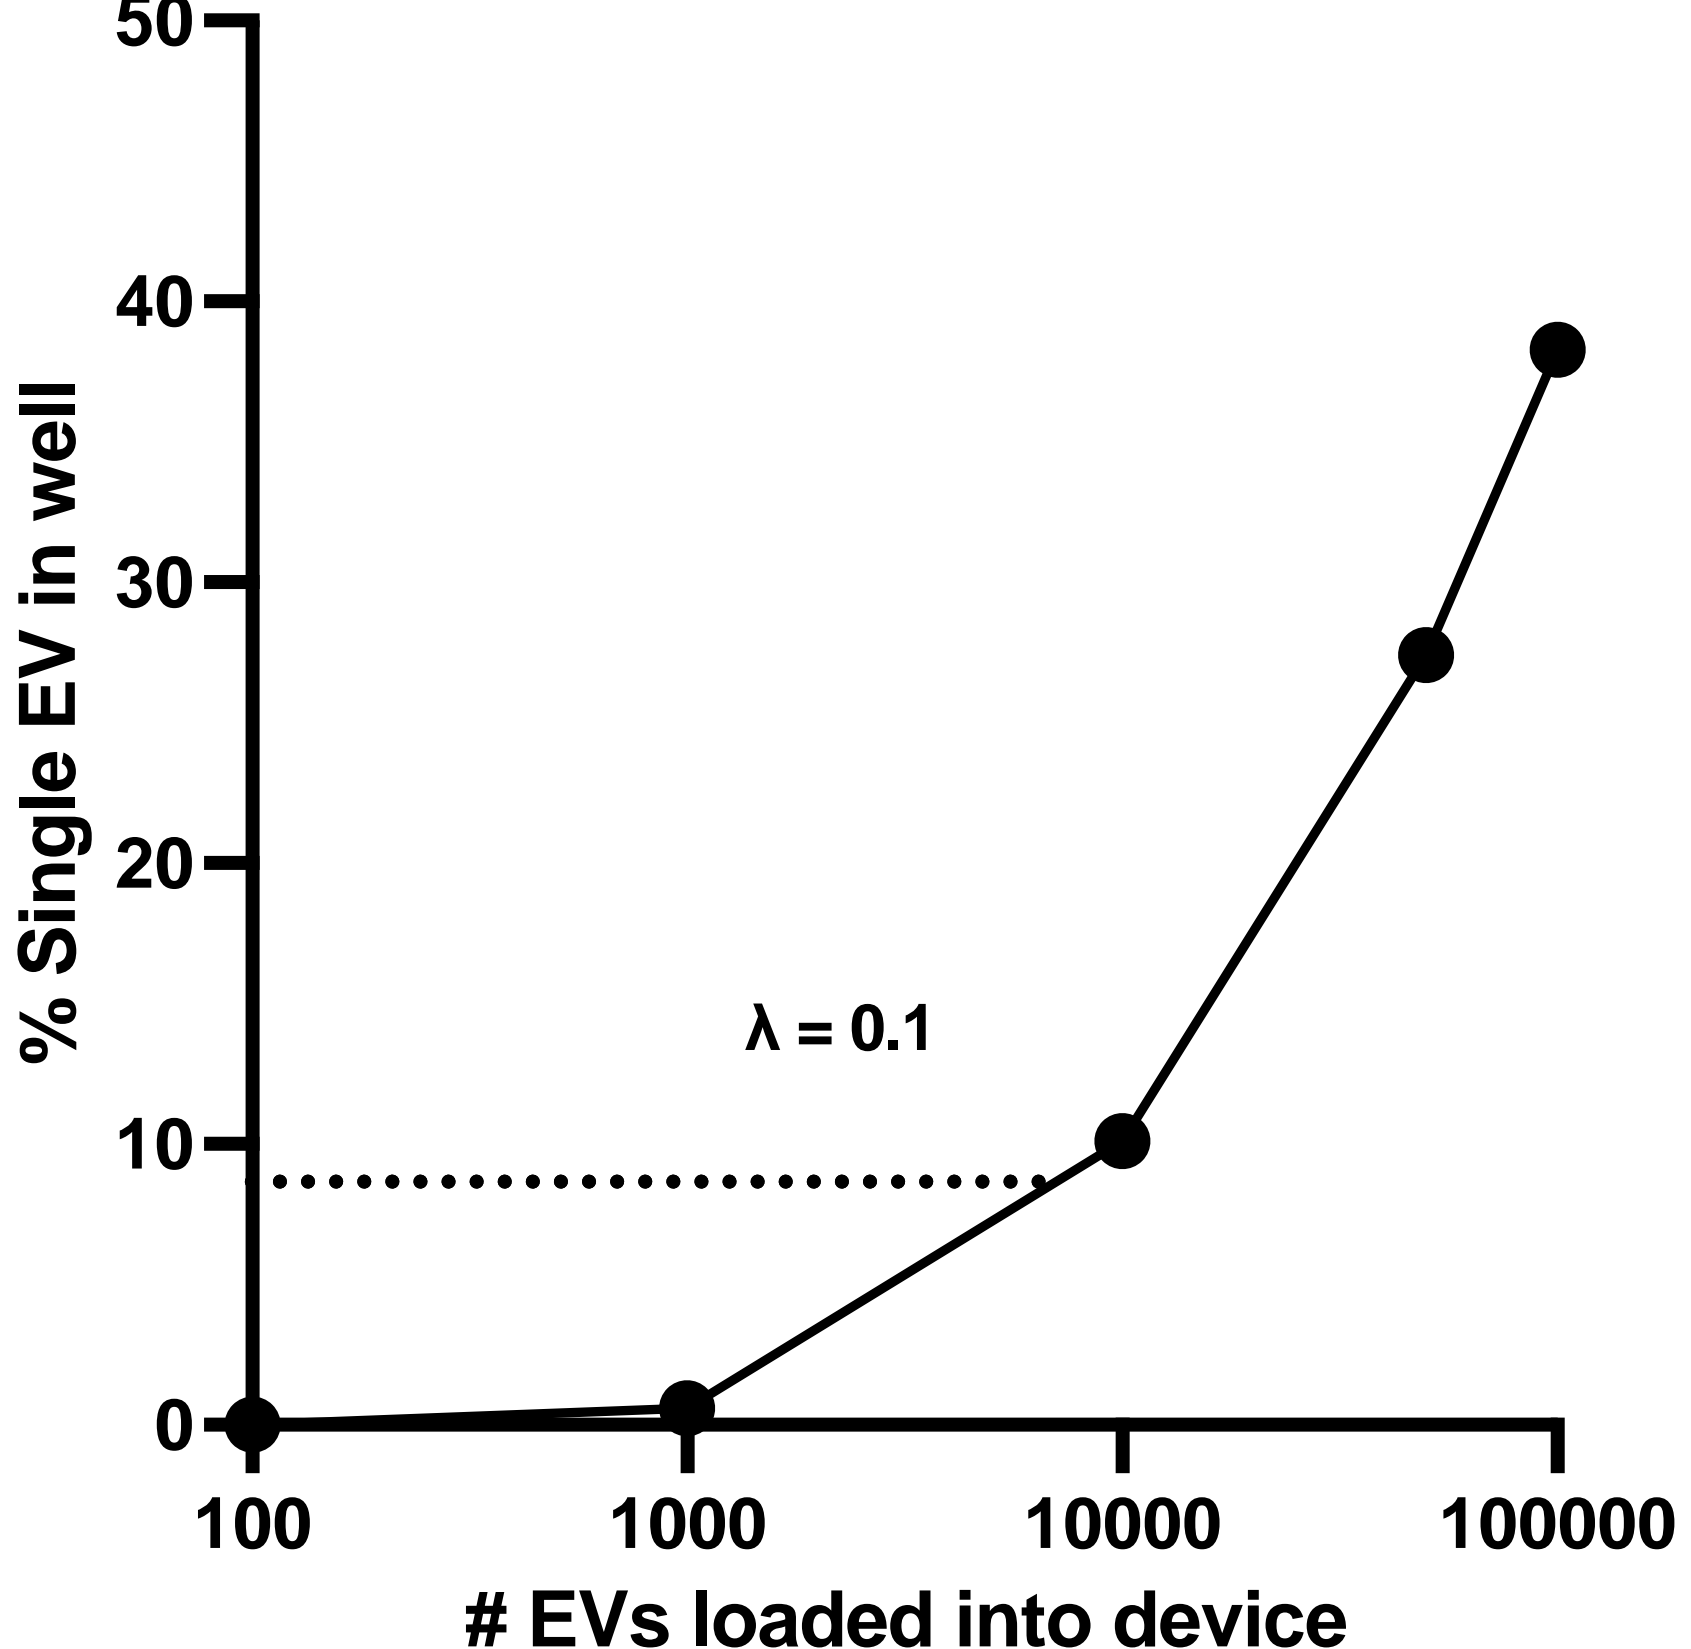

**Supplementary Figure 6.** Single-cell and EV loading into microwells. Lambda ( $\lambda$ ) is reported on each graph. For image analysis, individual cells and fluorescent beads were counted from individual wells from 3 separate frames and then averaged ( $n=3$ ).

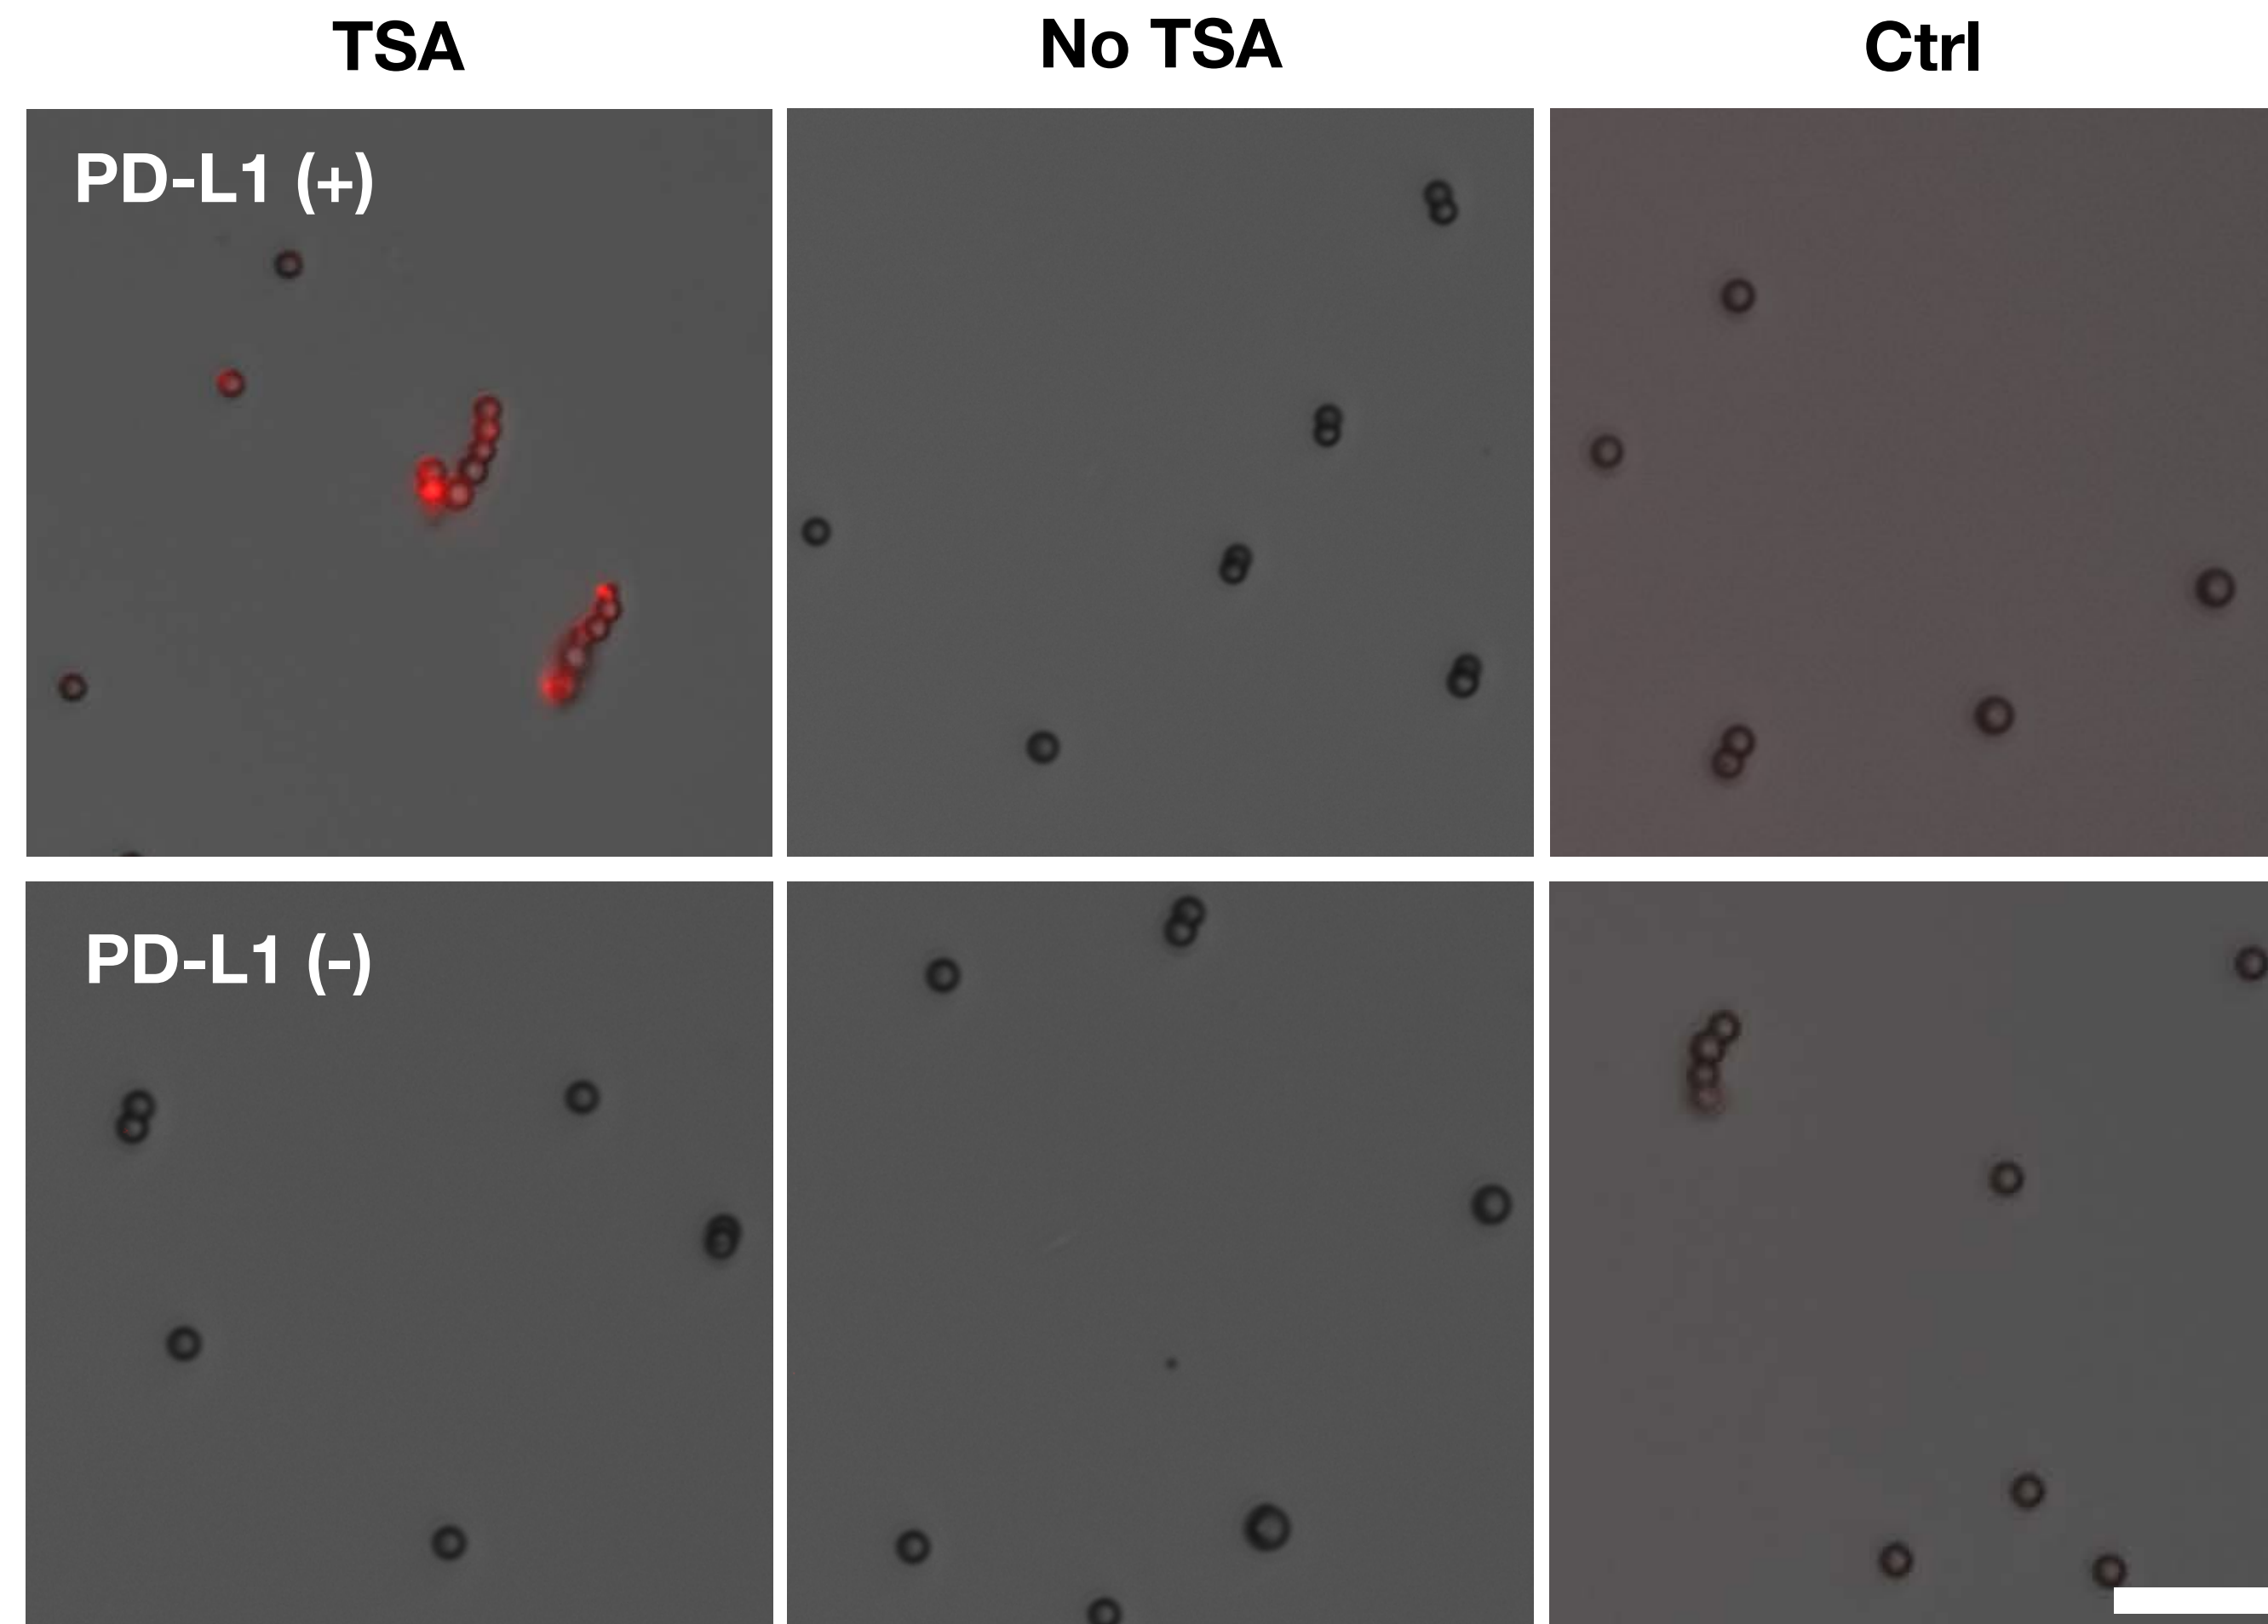

**Supplementary Figure 7.** PD-L1 protein detection off-chip. Images with TSA, positive control (no TSA), and negative control (ctrl). (Scale bar = 20  $\mu\text{m}$ )



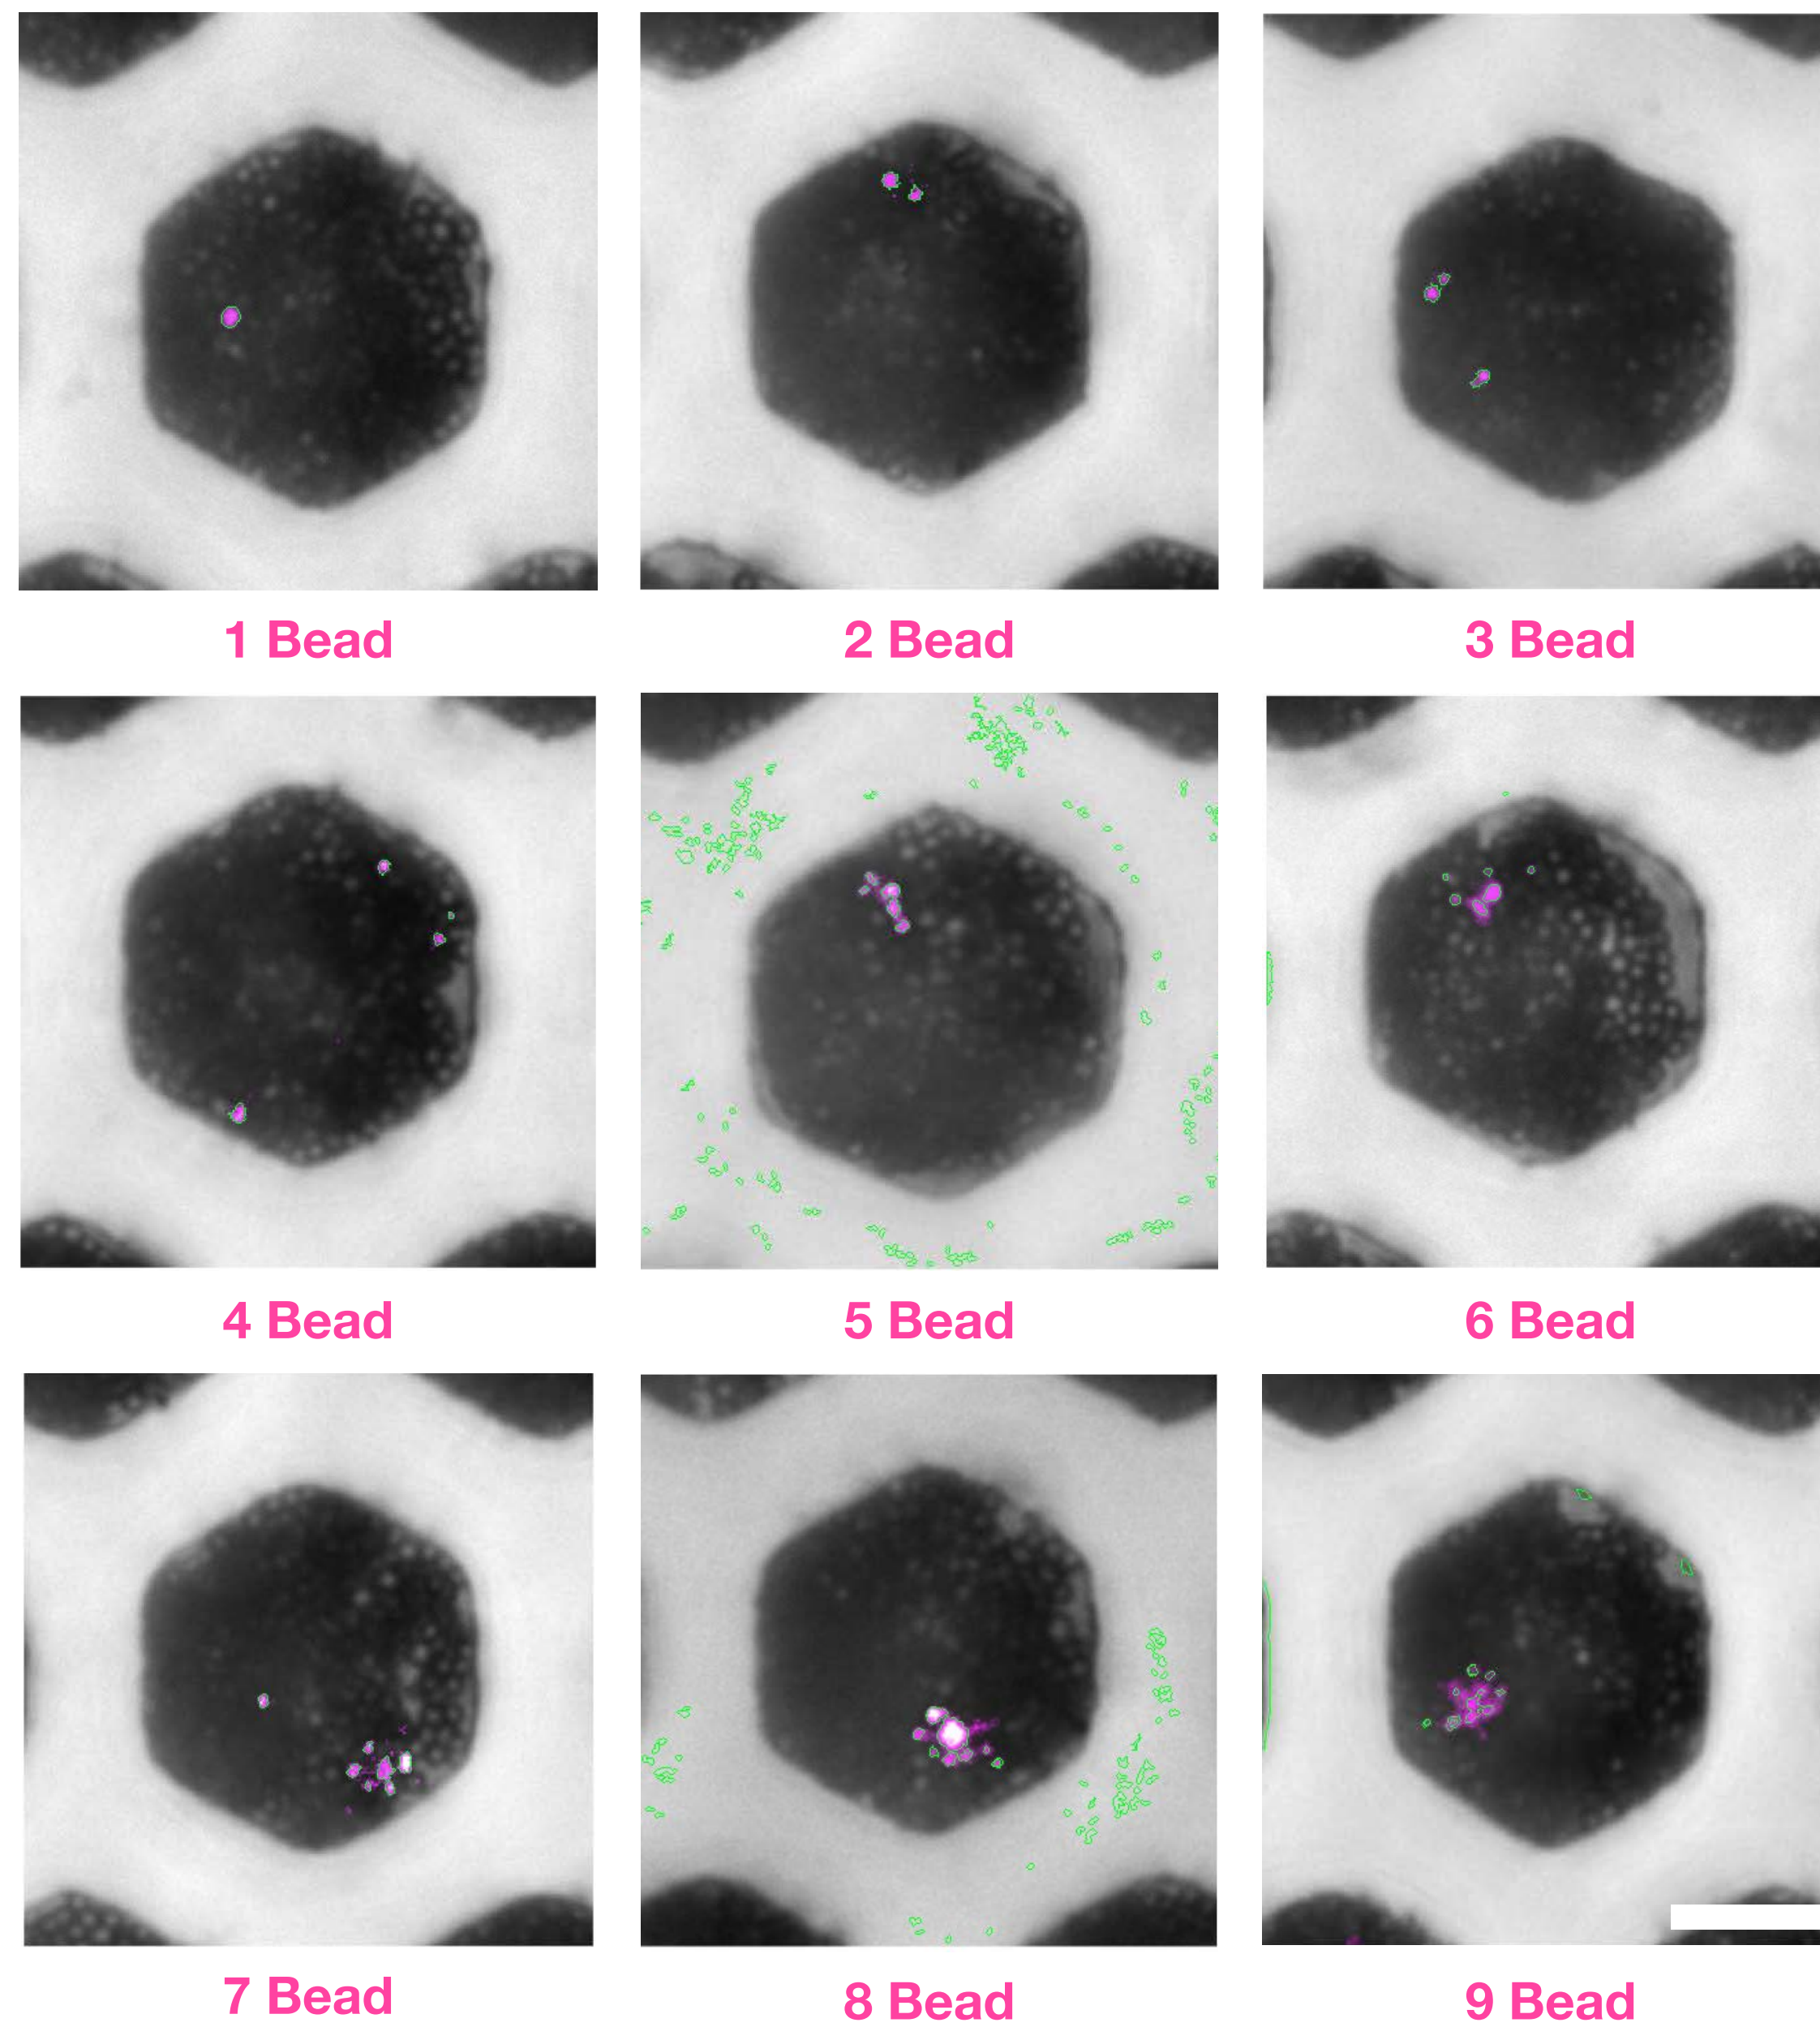

**Supplementary Figure 8.** Representative images showing individual positive fluorescent beads in individual microwells. (Scale bar = 20  $\mu\text{m}$ )

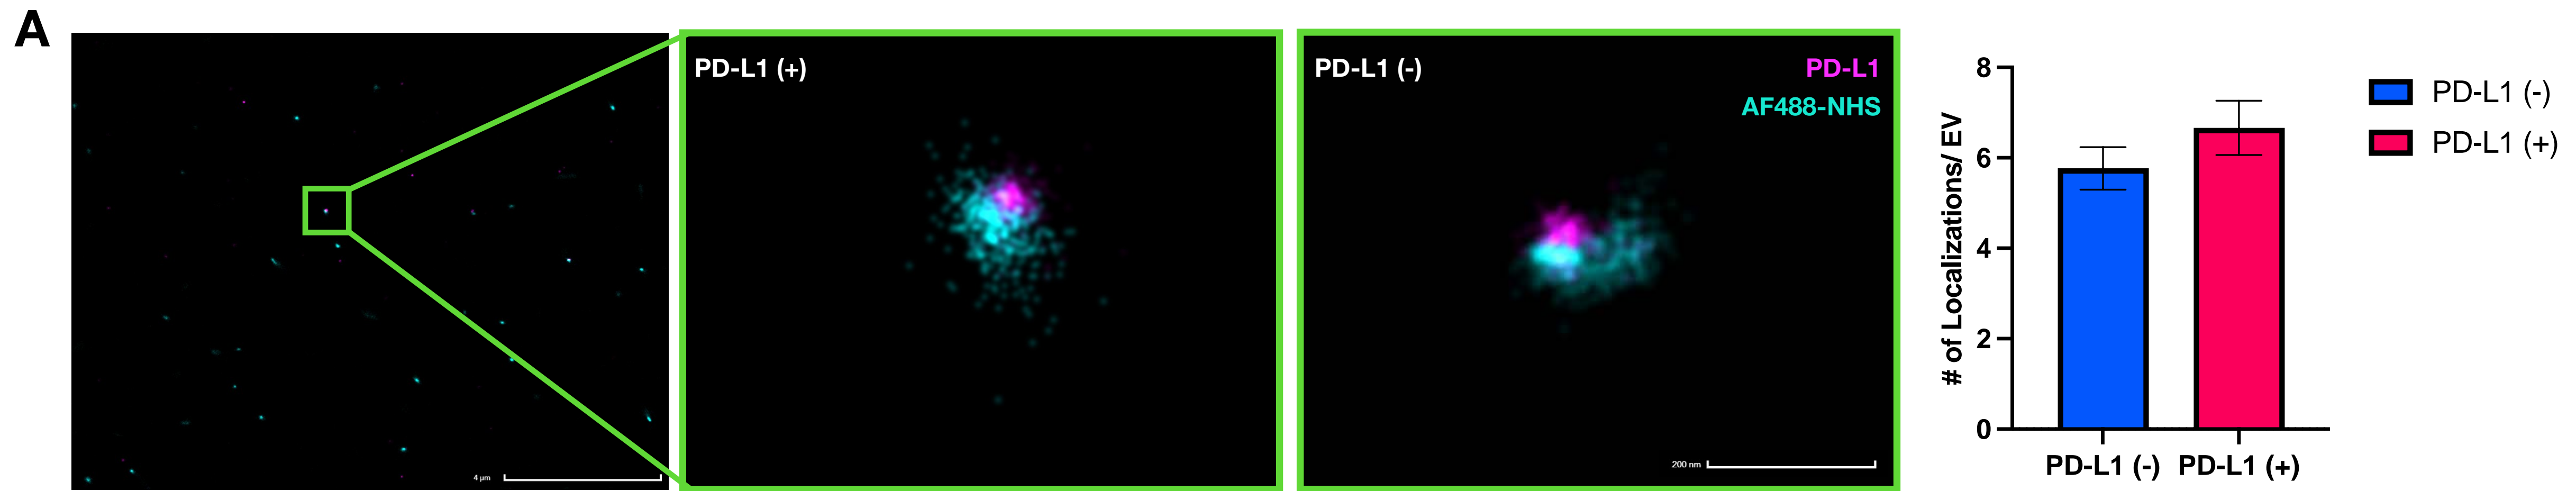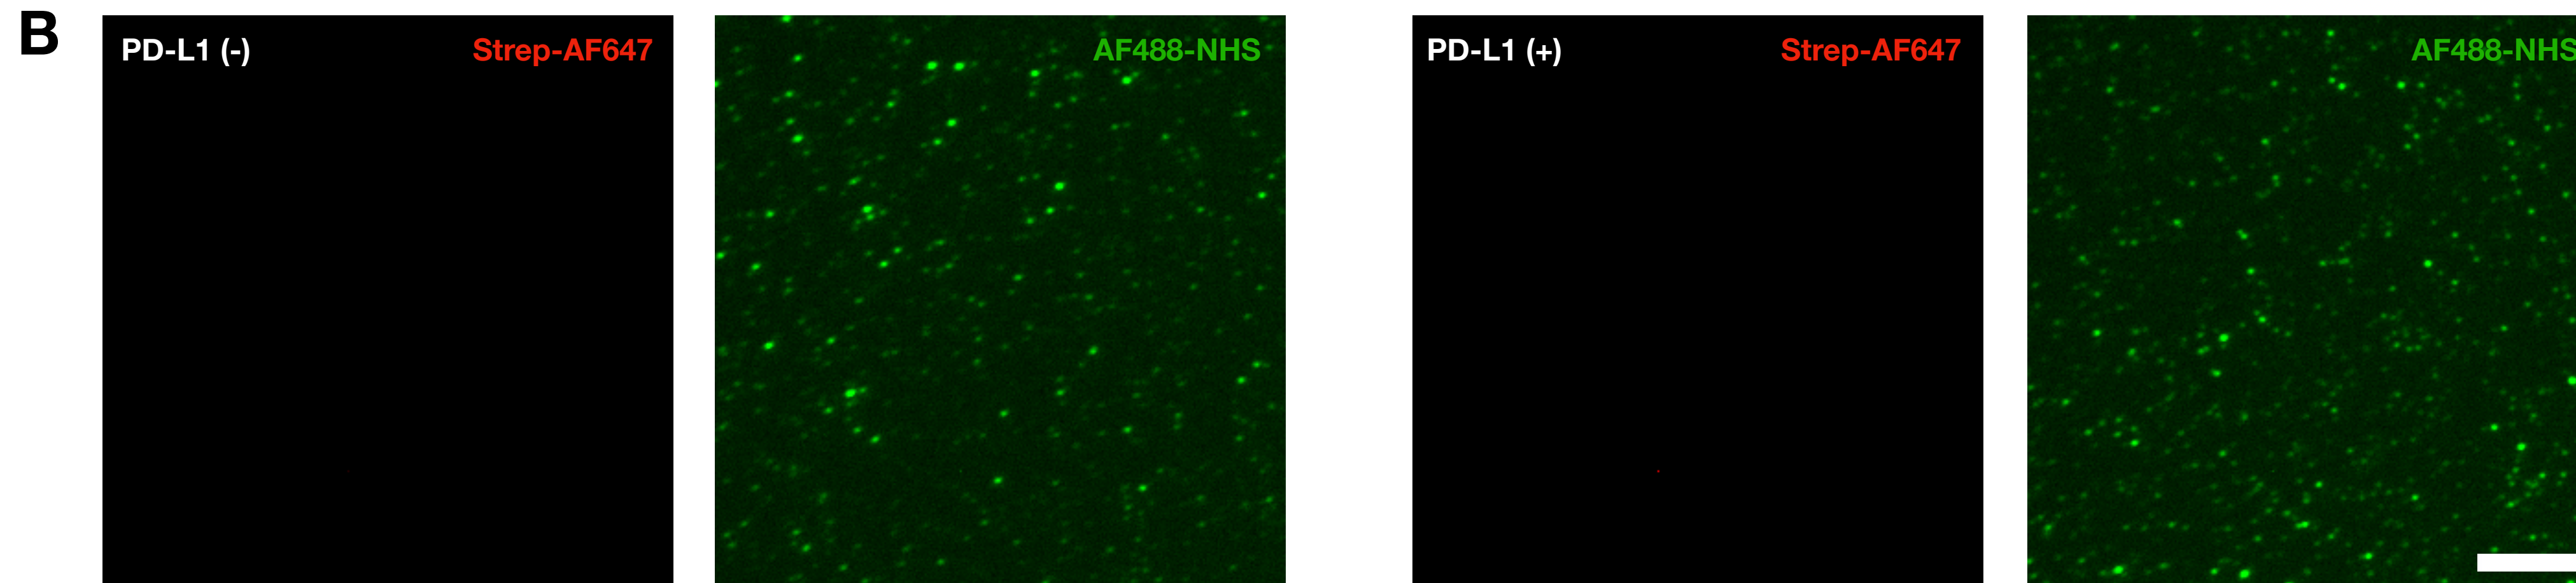

**Supplementary Figure 9.** Supplementary Figure 5. PD-L1 (+/-) EV fluorescence imaging. **A)** Super-resolution imaging of PD-L1 (+/-) EVs. The number of blinking events was counted from double-positive EVs (error bar = standard error). **B)** Fluorescence-based imaging of PD-L1 (+/-) EVs with an inverted fluorescence microscope.
